# Supplementary material
Source: MDPI journal article supplement (https://www.mdpi.com/2071-1050/12/8/3119)
Supplement: s1 [file s1]

## Sheet: Appendix I
No	Location	Type	Category	Practice	Comparator	Impact/Benefit	Value	Sustainability Dimensions	Indicators Measured	Impact
1	Review from different countries	Review	Soil Management	Tillage Practices	No till vs. Tillage - With vs Without residue management - Organic vs Inorganic Amendments - With vs Without Amendments	Impacts of these different practices on yield and on soil properties and quality	Long-term conservation tillage studies have shown that this practice can sustain or actually increase SOC when coupled with intensive cropping systems	1 Dimension		+
2	-	Review	Crop Management	Residue Management	Conventional vs Residue Management	Impacts of residue management on soil physical, chemical and biological quality	Data on nitrogen benefits and nitrogen recoveries from residues show that a considerable potential exists from residues, especially leguminous residues, not only in meeting the N demands of the succeeding crops, but also in increasing the long-term fertility of the soils.	1 Dimension		+
3	Australia	Research	Crop Management	Crop Rotation	4 irrigated rotation systems	changes in soil organic C, nitrate-N, and structure; cotton growth and yield; and profitability of 4 irrigated cotton–rotation crop sequences	Soil organic C in the 0–0.6 m depth was not affected by the rotation crop, although variations occurred between times of sampling. Regression analysis indicated that there had been no net gain or loss of organic C between June 1993 and October 1998. Sowing leguminous rotation crops increased nitrate-N values. A net increase in root-zone nitrate-N reserves occurred with time (from June 1993 to Oct…	2 Dimensions		+
4	USA	Research	Integrated Management	Organic Agriculture - Crop Rotation	Conventional vs Organic	Impact of organic agriculture and rotation on yields and on water capture. CNV: 5 Yrs maize-soybean rotation; MNR: manure-based organic of 5 Yrs maize-soybean-wheat-clover/hay rotation; LEG: legume-based organic of 3 Yrs maize-soybean-wheat-green manure rotation	Organic maize yielded 38% (problem of weed competition) and 137% relative to CNV, in LEG and MNR respectively, and 196% and 152% relative to CNV in soybean.	2 Dimensions		+
							Water capture in organic plots was approximately 100% higher than in CNV plots
5	Burkina Faso - Kenya	Research	Soil Management	Tillage Practices	conventional tillage vs conservation tillage	Impacts of conservation tillage practices on yields and soil quality	Improved tillage, where soil inversion is abandoned in favour of subsoiling, manual pitting, ripping and zero tillage systems, builds soil biology, improves soil fertility and contributes to immediate productivity benefits and long term resilience building. Conservation tillage have also proven to maximise rainfall infiltration and storage of water in the soil.	2 Dimensions		+
6	USA	Research	Integrated Management	Organic Agriculture	Conventional vs Organic - Amendment vs No Amendment - Irrigated vs rainfed	Impact of different agronomic practices on yields of crops	Yield trends over years were somewhat obscured by variability due to weather. Negative yield trends over years in unfertilised wheat controls were statistically significant, but only when data for the 9th year were included. Yield trends for organic maize were also significantly negative, but tomato yields in the same system showed a significant positive trend, as did yields of conventional maize.	1 Dimension		±
7	USA	Research	Integrated Management	Integrated Agricultural Systems	Monoculture vs integrated cotton–forage–beef cattle system	Impacts of crop diversity on water saving, soil microbial biomass and organic carbon	The integrated system have demonstrated water savings of about 25% achieved through integration, while remaining economically viable and diversifying income sources. Additional benefits included reduced soil erosion, lower chemical inputs including a 40%reduction in N fertiliser, improved soil microbial and enzymatic activities, enhanced C sequestration, and greater rainfall infiltration than the…	2 Dimensions		+
8		Review	Integrated Management	Tillage Practices - Crop Rotation - Cover Crop - Amendments	Sustainable practices vs conventional practices	The impact of different sustainable practices on soil carbon stocks	Additional carbon stock with respect to conventional practices (Mg C ha–1 year–1) … No Till: 0.07-0.33 … Crop Rotation: 0.05-0.25 …. Cover cropping: 0.15-0.25 …. Manure application: 0.05-0.15	1 Dimension		+
9	Italy	Research	Genetic Management	Crop Diversity	crop diversity vs monovariety	The impacts of crop diversity on yields	Results show that levels of crop biodiversity is positively and significantly related to production. It is found to be stronger when the level of rainfall is lower.	1 Dimension		+
10	Mexico	Research	Integrated Management	Tillage Practices - Crop Rotation - Residue Management	Sustainable practices vs conventional practices	The impacts of crop rotation and residue management on carbon sequestration	The long-term trial showed the positive effects of ZT seeding systems, crop rotation, and crop residue retention over 12 years.	1 Dimension		+
11	Italy	Research	Integrated Management	Amendments - Residue Management	Amended vs Unamended	The experiment compares yields, soil organic carbon and total nitrogen of organic and mineral fertilisations on a 2-year rotation: maize (Z. mays L.)—winter wheat (T. aestivum L.), without irrigation. Applications of the following materials: cattle manure (M), cattle slurry (S), wheat or corn residues (R), together with an unfertilised control (C), are factorially combined with increasing rates o…	Organic amendments had positive impacts on soil quality and yields. Manure being better than slurry and crop residue: SOC (g/Kg) ….. Control: 5.43; Manure: 8.17; Slurry: 7.04; Crop Residue: 6.44; N0: 6.66; N100: 6.68; N200: 6.87; N300: 6,87 …. TN (g/Kg) ….. Control: 0.77; Manure: 1.09; Slurry: 0.96; Crop Residue: 0.88; N0: 0.91; N100: 0.91; N200: 0.93; N300: 0.95 …. Wheat Yield (t/ha) ….. Control…	2 Dimensions		+
12	USA	Report	Integrated Management	Organic Agriculture - Cover Crop - Crop Rotation - Amendments	Conventional vs 2 Organic systems	Conventional: 5-year rotation (corn, soybeans, corn, corn, soybeans), fertiliser and pesticide applications according to the standard recommendations for Good Management Practices. Organic legume system: 3-year rotation (hairy vetch/corn, rye/soybeans, and wheat). The organic legume system depends on cover crops, intense rotation, and tillage to manage pests and nutrition. Organic manure system: …	Conventional farming used 30% more energy than the organic systems …. Organic legume system added an average of 744 Kg of carbon to the soil per hectare, and the manure system added an average of 1,217 kilograms of carbon per hectare ….. Organic Systems Trial have achieved yields comparable to the conventional systems in average years and have been 28- 34% higher than conventional yields in espec…	2 Dimensions		+
	Netherland			Organic Agriculture	Conventional vs Organic	Impacts of conventional and organic dairy farms on emissions and carbon sequestration	Organic dairy farms emit 40% less greenhouse gas per hectare of land ….. Carbon sequestration is equivalent to 0.4 metric tons of carbon per hectare per year	1 Dimension
	Egypt			Amendments	Desert areas vs organic	Impacts of compost to increase soil fertility in the newly settled organic farms in the desert	Soil carbon sequestration is 3 metric tons of carbon dioxide per hectare per year	1 Dimension
	Switzerland			Organic Agriculture	Conventional vs Organic	Impacts of organic farming on soil C sequestration, GHGs emission and food security	The upper 20 cm of the soil under organic agriculture contained about 1.5% C and decreased GHG emissions compared to conventional. The organic food production is more secure in periods of high or low rainfall.	2 Dimensions
	Indonesia		Landscape Management	Agroforestry	Conventional vs Organic Agro-forestry	Impacts of shaded organic Agro-forestry cocoa on C sequestration	56 % increase of carbon stored in the above and below ground biomass	1 Dimension
13	China	Research	Soil Management	Amendments	Inorganic Amendments vs Organic Amendments	The impacts of different organic and inorganic amendments on rice productivity, Organic Carbon (OC) accumulation and soil microbial biomass (SMBC and SMBN): no fertiliser application (NF), chemical fertiliser only (CF), chemical fertiliser plus pig manure (CFM), chemical fertiliser plus rice straw return (CFS).	No wide difference in rape seed yield between the different fertiliser treatments despite of a much lower yield at 0.37 t/ha/year under NF. The average rice yield reached 8.00 and 8.19 t/ha/year under CFS, CFM, respectively, compared to 6.43 t/ha/year under CF treatments, and low yield of 3.65 t/ha/year under NF. OC storage in the top soil (0-15 cm) …. NF: 27.9 g/Kg; CF: 30.94 g/Kg; CFM: 33.11 g/…	2 Dimensions		+
14	Sub-Saharan Africa	Review	Water Management	Water Harvesting	RHW vs No RHW	Impacts of Rainwater Harvesting (RWH) on ecosystem services	Literature reviewed showed positive impacts for many services, unclear relationship for some services, neutral impacts for a few service and a negative for one	3 Dimensions	Literature Review	±
15	Poland	Research	Biodiversity Management	Agroecology	Monoculture vs. Shelterbels	Impacts of shelterbelts on evapotranspiration, water losses, chemical compounds in groundwater and biodiversity	Compared to grain monoculture, shelterbelts increased actual total evapotranspiration and helped minising water losses from fields by about 20-40 mm per growth season. Field edge plantations reduced concentration of chemical compounds in groundwater as much as by 90%. Landscape structures allowed also to obtain a level of biodiversity comparable to national parks.	1 Dimension		+
16	-	Research	Integrated Management	Organic Agriculture	Organic vs Conventional	Impacts of Organic Agriculture on GHGs mitigation and soil quality	Organic agricultural systems have an inherent potential to both reduce GHG emissions and to enhance carbon sequestration in the soil. In a first estimate, emission reduction potential by abstention from mineral fertilisers is calculated to be about 20% and the compensation potential by carbon sequestration to be about 40-72%	1 Dimension		+
17	USA	Research	Biodiversity Management	Agroecology	organic tomato and grain vs landscape	Impact of landscape management (A riparian corridor, hedgerows, a system of drainage ditches, and tailwater ponds) on biodiversity	Riparian and hedgerow habitats with woody vegetation stored 18% of the farmscape’s total carbon (C), despite occupying only 6% of the total area. Infiltration rates in the riparian corridor were >230% higher than those observed in the production fields, and concentrations of dissolved organic carbon (DOC) in soil solution were as much as 65% higher. The tailwater pond reduced total suspended soli…	1 Dimension		+
18	USA	Research	Integrated Management	Organic Agriculture - Genetic Management	Conventional vs Organic - Monoculture vs Crop Rotation	Impacts of organic farming and crop rotation on soil quality and productivity	Soil C was 35% higher in organic (11.5 g/Kg) compared to conventional (8.5 g/Kg). Crop species diversity did not influence soil C. This systemwide comparison showed strong management and biodiversity effects: cumulative grain in organic was 20.0 Mg/ha, 20.4 Mg/ha, 16.6 Mg/ha and 17.7 Mg/ha in monoculture, biculture, three and six species systems, respectively, and in conventional was 25.6 Mg/ha, …	2 Dimensions		+
19	South Africa	Research	Water Management	Water Harvesting	Baseline: Dominant current smallholder management, i.e. no WH or fertilisation; A: in situ WH; B: ECOSAN	Impacts of Water Harvesting (WH) on smallholders maize farms	The river flow regimes of the basin are not likely to change significantly under any scenario. A: Compared to the baseline, the potential impact of in situ WH on smallholder maize yields is likely to be small (not significant), except for extreemly dry years.	2 Dimensions		+
			Soil Management	Amendments		Impacts of fertilisation with nutrients available from stored human urine (ECOSAN) on smallholders maize farms	B: The median increase across space, time and parameter sets is statistically significant, amounting to 30% yield increase (0.2 t/ha) and enhances temporal yield stability and reduces spatial yield variability.
20	Tanzania	Research	Integrated Management	Conservation Agriculture	Control (C): hand hoe tilling; CM: hand hoe + maize residue mulching + cover crops + manure; R: ripper tilling; RM: Ripper (conservation tillage) + maize residue mulching + cover crops + manure	Impacts of different tilling practices on yield, chemical, physical and biological properties of soils for smallholders maize farms	CM plots performed very similar to the control, although the yield gap seemed to increase towards the end of the experiment. RM treatments yielded better than the control. Regarding chemical properties, SOM content showed a statistically significant increase in the top soil from an average of 1.38% in C treatments to an average of 1.62% in RM treatments. The nitrogen content shows similar trends.…	2 Dimensions		+
21	India	Research	Landscape Management	Trees Plantation	Barren land vs Jatropha plantations	Impacts of Jatropha production for biodisel production on soil and water management of grazing wastelands (Indian degraded lands)	Water Balance: for barren land runoff constituted 40–60% of total rainfall amount, while for the Long-term Jatropha scenario, the corresponding figure is 20–40%. Between 4 and 17% of total rainfall was going to groundwater recharge, while the remainder was transferred to the atmosphere through evaporation or evapotranspiration (ET). Jatropha cultivation resulted in a reduction of the total soil l…	2 Dimensions		+
22		Review	Soil Management	Tillage Practices - Mulching Techniques	Conservation vs Conventional Tillage - Mulch vs no mulch	Impacts of tillage practices and mulching on biomass and yields of crops, water holding capacity, soil moisture contents, organic carbon and bulk density	Mulching increases average biomass by increasing soil’s water-holding capacity and increases consequently yields - Tilling practices improve soil organic carbon, bulk density and reduce infiltration rates -	2 Dimensions		+
23	Colombia & Mexico	Research	Landscape Management	Agroforestry	Conventional Pastoral System vs ISS	Impacts of Intensive silvopastoral systems (ISS) on dairy production	ISS systems in Colombia and Mexico (dry tropics), produced almost the same amount of milk per hectare (10000 L/ha/yr vs 10800 L/ha/yr) as much as a conventional system in Costa Rica (humid tropics). Without considering the environmental tradeoffs of ISS	1 Dimension		+
24	Turkey	Research	Soil Management	Tillage Practices	No till vs conventional tilling	Impacts of no tilling practice on soil quality	The SOM and total nitrogen (N) values were inversely related to cultivation intensity or duration, while the highest values were from the uncultivated site. Labile biomass C and N values followed the same trends with cultivation, whereas available P increased with cultivation time; in contrast, the percentage of water-stable aggregates decreased with cultivation duration.	1 Dimension		+
25	-	Review	Integrated Management	Organic Agriculture	Organic vs Conventional	Impact of Organic Farming vs Conventional agriculture on various biodiversity indicators and ecosystem services	All articles identified in this review reported a significant increase in at least one variable which enhances biodiversity on sites farmed organically compared to sites farmed conventionally. Results are highly variable between studies and indicators assessed. Direct relationship between biodiversity and ecosystem services are unclear.	1 Dimension	Ecosystem-based approach	±
26	Mexico	Research	Integrated Management	Conservation Tillage - Irrigation Regimes	Conventionally Tilled Bed (CTB) vs Permanent raised Bed (PB)	Impacts of tillage practices and irrigation regimes on physical and chemical soil quality and yield. Treatments included: tillage (conventionally tilled raised beds where new beds are formed after disc ploughing before planting [CTB] and permanent raised beds [PB]) and irrigation regimes (full and reduced).	PB improved soil structure and direct infiltration, increased topsoil K concentrations (0-5 cm; 1.6 cmol kg-1 in PB vs. 1.0-1.1 cmol kg-1 in CTB) and reduced Na concentrations (0-5 cm; 1.3-1.4 cmol kg-1 in PB vs. 1.9-2.2 cmol kg-1 in CTB). No difference in grain yield was found between tillage systems under full irrigation, but under reduced irrigation the improved soil quality with PB resulted i…	2 Dimensions		+
27	Vietnam	Research	Integrated Management	Integrated Agricultural Systems	Integrated rice-fish farming vs Rice monoculture	Impacts of integrated rice-fish farming and integrated pest management on farm incomes. Conventional monoculture rice farms (R), monoculture rice farms grown respecting integrated pest management (RIPM), Rice-fish farms (RF), Rice-fish farms with integrated pest management (RFIPM)	Rice-fish farmers had significantly higher income compared to rice monoculture. R<RIPM<RFIPM<RF	1 Dimension		+
28	UK	Research	Integrated Management	Extensive Systems	Intensive Grazing vs. Extensive Grazing	Impacts of extensive grazing (unfertilised, extensively grazed and cut, species-rich haymeadow), compared to intensively managed (fertilised and grazed, species poor grassland) on immobilisation of N by a more fungal dominated microbial community	Extensively managed, species-rich grasslands of high conservation value increased abundance of fungi relative to bacteria generating lower N loss and greater N retention due to greater root uptake and microbial immobilisation.	1 Dimension		+
29	-	Review	Integrated Management	Conservation Agriculture	Conventional vs Conservation	Impacts of conservation agriculture compared to conventional agriculture on ecosystem services	compared with conventional farming systems, diversified farming systems support substantially greater biodiversity, soil quality, carbon sequestration, and water-holding capacity in surface soils, energy-use efficiency, and resistance and resilience to climate change. Relative to conventional monocultures, diversified farming systems also enhance control of weeds, diseases, and arthropod pests an…	3 Dimensions	Ecosystem-based approach	+
30	India	Research	Soil Management	Amendments	Conventional Amendment vs Manure	Impacts of different soil amendments on yields, sustainable yield index (SYI) and soil quality. T1: Control (no N–P–K fertilisers or organics); T2: 50 kg N ha-1 as urea; T3: 25 kg N ha-1 through crop residues (CR) as sorghum stover +25 kg N ha-1 through Leucaena clippings.	a combined use of organic manure (crop residues and FYM) or green leaf manure along with chemical fertiliser is essential to enhancing SOC sequestration in sorghum cultivation. Yields …. T1: 0.61 Mg/ha; T2: 1.04 Mg/ha; T3: 1.19 Mg/ha …. Bulk Density …. T1: 1.51 Mg/m3; T2: 1.51 Mg/m3; T3: 1.48 Mg/m3 …. Soil Organic Carbon … T1: 3.2 g/Kg; T2: 3.5 g/Kg; T3: 4.5g/Kg .... SYI .... T1: 0.38 .... T2: 0.…	2 Dimensions		+
31	UK	Research	Genetic Management	Crop Diversity	Diversity vs monoculture	Impacts of land-use diversity on economic resilience of agriculture	Land-use diversity may have an important role in ensuring resilient agricultural returns in the face of uncertain market and environmental conditions, and land-holding size plays a pivotal role in determining the relationships between resilience and returns at a landscape scale.	1 Dimension		+
32	Mexico	Research	Soil Management	Amendments - Crop Rotation	Conventional vs Crop Rotation vs Organic fertilisation	the impacts of three different production systems. CCS: Conventional Cultivation System (continuous maize monoculture); CRS: Crop Rotation System (Alternated maize-legumes cropping); OFS: Organic Fertilisation System	During the first year, low-input systems, which are based on the use of organic fertilisers and crop rotation, provided better results in terms of ecological indicators and equal results in terms of economic and social indicators than those achieved using a high chemical input system. In the second year, which featured early frosts and a winter drought, productivity declined in all systems; howev…	2 Dimensions	Positive outcomes in extreme conditions	+
33	Ethiopia	Research	Integrated Management	Integrated Agricultural Systems	Conventional vs Agro-Pastoral vs Landless Intensive	The impacts of two pastoral systems (agro-pastoral (AP), and landless intensive (LI)) on sustainability compared to the conventional pastoral system (P)	Results indicate that Agro-Pastoral was the most sustainable while P and LI were only conditionally sustainable.	3 Dimensions	Qualitative method	+
34	Costa Rica	Research	Integrated Management	Intercropping - Organic Agriculture	Intercropping vs Organic vs Conventional	The impacts of different practices on farm inputs use	The organic systems used the lowest inputs followed by banana-coffee intercroppping, compared to conventional banana producers.	1 Dimension		+
35	-	Review	Integrated Management	Soil Amendments - Tillage Practices - Cover Crops - Intercropping - Crop Rotation - Agroforestry - Water Harvesting		The impacts of these different techniques and practices on soil sequestration and yields	The major points are: (1) sustainable land management generally leads to increased yields, although the magnitude and variability of results varies by specific practice and agro-climatic conditions. For instance, yield effects are in some cases negative for improved fallows, terraces, minimum tillage, and live fences. Whereas, positive yield effects are observed consistently for cover crops, orga…	2 Dimensions	Positive outcomes in extreme conditions	+
36	Ghana	Research	Knowledge Management	Indigenous Knowledge Systems		The impacts of Indigenous knowledge to increase resilience of farmers to droughts	The results show that farmers are planting multiple indigenous drought resilient crop varieties and employing different rounds of seeding and or staggering planting between multiple farms. They are also applying indigenous forms of organic manure, checking soil erosion through grass strips and stone terracing and adopting paddy farming for improving soil and water conservation towards enhancing p…	1 Dimension	Qualitative method	+
37	Sub-Saharan Africa	Review	Water Management	Water Harvesting	RWH vs rainfed	The impacts of RWH on different ecosystem services	Water harvesting practices have shown promising results in reducing risks, and improving yields whilst also delivering positive impacts on other ecosystems.	3 Dimensions		+
38	Tanzania	Research	Integrated Management	Water Harvesting - Tillage Practices	irrigated vs rainfed - Conservation tillage vs conventional tillage	The impacts of rainwater harvesting and conservation tillage on yield, soil health and water balance	Under conservation tillage, the average grain yield increases of 17%. Soil nitrogen increases from 0.08% to 0.11%, soil organic matter increases from 1.38% to 1.62% and microbial activity doubled (from 175 to 356 mg CO2 g1). Under Conservation tillage + supplemental irigation: Average grain increase of 94%, Increased infiltration (with 40 to 100%), Increased transpiration (with 47% on average) an…	2 Dimensions		+
39	USA	Review	Integrated Management	Integrated Agricultural Systems		The impacts of crop rotation and integration of crop-range-livestock farming on soil quality and economic returns	Results indicate that diverse crop rotations, reduced soil disturbance and integrated crop-livestock systems could increase economic returns and agroecosystem resilience.	2 Dimensions		+
40	Kenya	Research	Integrated management	Conservation Agriculture	Conservation Agriculture vs Conventional Agriculture	The impact of conservation agriculture on resilience	Conservation agricultural practices improved social, environmental and economic resilience of farmers	3 Dimensions	Qualitative method	+
41	Mauritius	Research	Soil Management	Mulching Techniques	unmulched vs mulching	The impacts of 3 different mulching practices (banana leaves (B), coconut leaves (C) and vetiver leaves (V) at a rate of 40 t/ha) on sediment loss (SL), nutrient loss (NL) and runoff (R) in comparison to unmulched control (CL)	Results showed that all the mulches tested contributed to lowering of soil and nutrient losses, albeit in varying amounts. Coconut leaves mulch was found to be the most efficient, followed by vetiver and then banana leaves. Percentage mitigation in soil and nutrient erosion was found to be 28. 9% for banana leaves at 10 t ha-1, and 57. 3% for coconut leaves at 40 t ha-1.	1 Dimension		+
42	USA	Research	Integrated Management	Crop Rotation - Intercropping - Prairie buffer strips - native species		The impacts of different rotation practices, intercropping, prairie buffer strips and native species on input reduction, soil and water conservation, biodiversity conservation and profitability	Results from these experiments indicate that (1) diversification of the dominant corn-soybean rotation with small grains and forage legumes can permit substantial reductions in agrichemical and fossil hydrocarbon use without compromising yields or profitability; (2) conversion of small amounts of cropland to prairie buffer strips can provide disproportionately large improvements in soil and water…	2 Dimensions		+
43	India	Research	Soil Management	Amendments	Inorganic Amendement vs Farm manure	The impacts of farm manure on yields, C sequestration, emissions reductions and soil properties	The carbon sequestration potential of farm manure (FMY) plots was about 459 more than inorganic amendments + manure (NPK). The same plots reduced 53 carbon equivalent emission with comparison to NPK. The soil cation exchange capacity (CEC) under FYM plots was 22 than NPK. The soil cracking volume under FYM plots (57 cm3/m2 area) was very less compared to NPK (324 cm3/m2 area).The morning soil tem…	2 Dimensions		+
44	Lao PDR	Research	Soil Management	Amendments	rice husk biochar, bentonite clay, compost, clay-manure compost, and rice husk biochar compost,	The impacts of different amendments (rice husk biochar, bentonite clay, compost, clay-manure compost, and rice husk biochar compost) on yields	The enhancement of maize yield due to soil amendments ranged from 0.77 to 3.79 t ha-1 in the first region and from 1.21 to 5.14tha-1 in the second region	1 Dimension		+
45	-	Review	Integrated Management	Crop Diversity - Integrated Agricultural Systems		Impacts of crop diversification and integrated crop-livestock management on soil quality and economic returns	Results demonstrated that diversifying agricultural systems via increasing plant species in managed grasslands and combining several crop species into logical sequences and dynamic rotations can enhance crop production, the use of natural resources and in some instances improve economic returns.	2 Dimensions		+
46	India	Research	Soil Management	Amendments - Crop Rotation		Impacts of seven rainfed cropping systems, crop rotation and different soil amendments on yield, SYI and soil carbon sequestration. Recommende Management Practices (RMPs) include diverse crop rotations with legumes, and integrated nutrient management (INM) involving addition of farmyard manure (FYM), use of groundnut shells (GNS) and other crop residues (CRs), green leaf manuring (GLM). Common so…	The magnitude of increase in yield (Mg/ha) in respect to control is from: (1) 0.78 to 1.03 in groundnut with 50% RDF+FYM 4 Mg/ha, (2) 0.40 to 1.34 and 0.82 to 3.96 in groundnut and finger millet, respectively, through FYM 10 Mg/ha + 100% NPK in groundnut–finger millet rotation, (3) 0.84 to 3.28 in finger millet through FYM10 Mg/ha + 100% NPK, (4) 0.61 to 1.19 in winter sorghum through 25 kg N ha-…	2 Dimensions		+
47	Australia	Research	Integrated Management	Organic Agriculture - Crop Rotation	Organic Agriculture vs Conventional Agriculture	Impacts of Organic Agriculture on Substrate induced respiration (SIR) and community level physiological profiles (CLPP) of soil microbial communities	Substrate induced respiration (SIR) and community level physiological profiles (CLPP) were significantly different in both planted and unplanted systems and in conventional and organically-managed farming systems with no interaction; planted and organic systems had higher SIR. Following heat treatment (30 min at 70 °C), CLPP of planted and unplanted soils in both farming systems changed; a small …	1 Dimension		+
48	Ethiopia	Research	Integrated Management	Crop Diversity - new seeds - Tillage Practice	Sustainable practices vs conventional practices	Impacts of different sustainable practices on income and input use ( cropping system diversification, conservation tillage and modern maize seed)	The adoption of Sustainable Agricultural Practices increases maize income and the highest payoff is achieved when SAPs are adopted in combination rather than in isolation. Second, nitrogen fertiliser use is lower in the package that contains system diversification and conservation tillage. Third, conservation tillage increased pesticide application and labour demand, perhaps to compensate for red…	2 Dimensions		+
49	China	Research	Crop Management	Crop Rotation	Cotton/barley vs rice/rape	Impacts of two diverse crop rotation practices on soil quality using Soil Quality Index (SQI: SOM, SOCD, AP, CEC, AK, ECe, and If).	Results indicated that cultivation had significant effect on some soil profile characteristics. Compared with cotton/barley rotation soil, rice/rape rotation soil was characterised by higher organic matter, undifferentiated nutrient storage and salinity/alkalinity, lower water accommodation and infiltration, and adverse groundwater conditions. Cotton/barley rotation had higher SQI values over ric…	1 Dimension		+
50	China	Research	Soil Management	Amendments	Litter vs no amendment	Impacts of Litter addition on soil quality and crops resilience to stress	Litter quantity was significantly and positively correlated with soil organic carbon (SOC) and microbial biomass carbon (SMB-C) concentration, soil structural properties (porosity and aggregate stability) and the resilience to both perturbations. These biophysical soil properties (SMB, SOC and capillary porosity) were significantly correlated with the resilience to heating and the resistance and …	1 Dimension		+
51	India	Review	Integrated Management	System of Crop Intensification (SCI)	SCI vs Conventional	Impacts of SCI on productivity of finger millet and wheat	In the South: Conventional crop management, which starts with broadcasting finger millet seed on a tilled field, gives yields between 1.25 to 2 tonnes/ha. With the SCI the millet plants had 40 to 80 tillers and gave yields of 3.75 to 5 tonnes/ha, even up to 6.25 tonnes. To the East, usual yields there with traditional broadcast practices are around 1 tonne/ha. By starting the SCI yields rose to 3…	1 Dimension		+
	Ethiopia						The yield was equivalent to 7.8 tonnes/ha, compared to usual millet yields of 1.4 tonnes/ha from fields established by conventional broadcasting, or 2.8 tonnes/ha with generous use of compost.
	Mali					Impacts of SCI on productivity of wheat	in Mali SCI on wheat showed a 13% yield increase, producing 2.22 tonnes/ha. Farmers were pleased with their 94% reduction in seed requirements with this method of SWI (10 kg/ha vs. 170 kg/ha); also they found their labour investment reduced by 40%, and their need for irrigation water was 30% less. Thus, farmer interest in this innovation was aroused. While the highest yield was 5.4 tonnes/ha comp…
	Nepal					Impacts of SCI on productivity of wheat	SCI methods a reduction in seed rates by >80%, and gave small farmers 91% more yield than from local practices with this same variety (6.5 vs. 3.4 tonnes/ha). The number of grains per panicle was 75 vs. 44, and grain weight (grams per 1000 grains) was 29% higher with SWI. Although farmers’ expenditures with SWI’s more intensive crop management were 58% higher per ha (Rs 5,010 vs. Rs 3,170), farme…
	Ethiopia					Impacts of SCI on productivity of tef	Tef yields are usually only about 1 tonne/ha. With SCI and the application of organic and inorganic soil nutrients, tef yields could be raised to 3 to 5 tonnes/ha. Further, with micronutrient soil amendments (Zn, S, Mn, and Mg), these improved yields could be almost doubled again.
52	Uruguay	Research	Soil Management	Tillage Practices	Reduced Tillage vs Traditional Tillage	The impact of tillage, crop residue management, and organic matter incorporation on runoff, soil erosion, water dynamics, and productivity of a raised bed tomato-oat rotation system.	Reduced Tillage (RT) decreased soil erosion and runoff by more than 50% compared with the three conventional tillage systems. Water Use Efficiency under RT was reduced between 35-43%. In a dry season, RT increased soil water capture by 20% (45 mm) compared with conventional tillage treatments. However, yields were reduced more than 50% under RT.	2 Dimensions		+
53	Canada	Review	Soil Management	Tillage Practices	Traditional tillage vs zero tillage	Impacts of conservation tillage (CT) on farm income and soil erosion.	The switch from Traditional Tillage (TT) to Zero Tillage (ZT) increased herbicide requirement by 48% but decreased labour requirement by 31%, fuel needs by 39%, and machinery hours of operation by 45%. The decrease in machinery hours of operation under ZT decreased the cost of machinery service (i. e., investment, depreciation, insurance and repair costs), with most of this accruing in the cost o…	2 Dimensions		+
54	Australia	Research	Integrated Management	Integrated Agricultural Systems	Traditional systems vs integrated systems	Impacts of integrate crop and livestock production on farm productivity, sustainability and business risk	This practice provides risk management benefits, diversifies crop rotations, reduces pressure on other feed resources and can significantly increaseboth livestock and crop productivity from farms by 25–75% with little increase in inputs. Replacing annual pastures with perennial pasture phases in rotation with crops canprovide a range of benefits including improved hydrological balance to reduce d…	2 Dimensions		+
55	France	Research	Integrated Management	Integrated Agricultural Systems	Traditional systems vs integrated systems	Impacts of integrate crop and livestock production on	The French case study, based on self-sufficient farming systems belonging to a sustainable agriculture network, highlights that cost-cutting management led to a win-win strategy comprising good economic and environmental performances. The farms decreased their dependence on external inputs and had only a limited loss of production. The past trajectories of the farms illustrate how increasing the …	2 Dimensions		+
	Brazil						The Brazilian case study also illustrates how the diversification of production increased the resilience of the system to market shocks.	1 Dimension
56	Africa	Review	Knowledge Management	Traditional Knowledge Systems	traditional knowledge vs conventional	Impacts of traditional knowledge (i.e. agroforestry and intercropping) on nutrient cycling, water-use and yields	Traditional, resource-conserving approaches such as agroforestry can positively influence the drivers of intensification such as nutrient-cycling and water-use and help close the yield gap in Africa. The use of legumes in rotations or intercrops can restore soil nutrients by fixing nitrogen, improving soil organic matter and reducing reliance on fertiliser use. Practices involving species mixture…	2 Dimensions		+
57	USA	Research	Landscape Management	Traditional Systems	Traditional vs conventional	Impacts of traditional irrigation systems in New Mexico on ecosystem services	The traditional gravity flow irrigation methods of these systems enhance vegetative cover and diversity, support wildlife habitat, recharge shallow aquifers, sequester carbon, improve air and water quality, retain storm-water flow, and control flooding. They also provide nutrient cycling and soil formation, ecotourism and environmental education, extension of the irrigation season, and aesthetic …	3 Dimensions	Ecosystem-based approach	+
58	USA	Research	Landscape Management	Trees Plantation	perennial agroecosystems vs monoculture	Impacts of perennial agroecosystems on microbial activity and soil quality	The research demonstrates that perennial agroecosystems can affect the physiological capacity of the microbial community, yielding communities with greater nitrogen retention and greater rates of decomposition as a result of allocation of resources towards enzyme production and nitrogen mining.	1 Dimension		+
59	Benin	Research	Integrated management	Organic Agriculture	Organic vs Conventional	Impacts of Organic agriculture on farm economics and yields	Results found that agricultural practices of organic cotton production directly reduced the most frequent climatic risks that households faced, and indirectly contributed to reducing economic risks and to empowering women. However, yields and margins are lower.	1 Dimension		±
60	France	Research	Integrated Management	Organic Agriculture - Integrated Agricultural Systems	Conventional vs Integrated systems	Impacts of organic agriculture and integrated agriculture on productivity, energy consumption and	The productivity of organic cropping systems was below that of their local reference, ranging from 22% to 7.6%. Organic cropping systems were significantly less energy efficient than other systems. Despite their energy consumption being lower, notably due to their low reliance on nitrogen fertilisers, it was not sufficient to offset their limited productivity.	2 Dimensions		-
61	Spain	Research	Water Management	Unconventional Water	desalinated water vs natural water	Impacts of water and energy consumption when natural water sources are partially replaced by desalinated sea water	The use of 16.8% of desalinated seawater would increase energy consumption by 32.4% and GHG emissions by 19.6%, whereas for the use of 26.5% of desalinated seawater such increases would amount to 50.0% and 30.3%, respectively. Therefore maintaining irrigated agriculture in water-stressed regions by incorporating high energy demanding non-traditional water sources could negatively contribute to co…	1 Dimension		-
62	-	Review	Genetic Management	Crop Diversity	Diversity vs pure line	Impacts of crop diversity on soil microbial biomass and organic matter dynamics	Adding one or more crops in rotation to a monoculture increased total soil C by 3.6% and total N by 5.3%, but when rotations included a cover crop (i.e. crops that are not harvested but produced to enrich the soil and capture inorganic N), total C increased by 8.5% and total N 12.8%. Rotations substantially increased the soil microbial biomass C (20.7%) and N (26.1%) pools, and these overwhelming…	1 Dimension		+
63	USA	Research	Genetic Management	Cultivar Diversity	Diversity vs pure line	Impacts of cultivars diversity of forage grass on productivity	The mean monoculture cultivar yield, L. perenne yields were significantly greater in the three cultivar mixtures (mean increase 67 g/m2) and the six cultivar mixture (mean increase 125 g/m2)	1 Dimension		+
64	-	Review	Integrated Management	Sustainable Intensification	SI vs conventional	The impacts of sustainable intensification on yield, incomes, social capital and biodiversity	Improve yields and incomes, improve natural capital in on- and off-farm landscapes, build knowledge and social capital. Greater appreciation of the contribution of multiple ecosystem services provided by agricultural landscapes and awareness of the two-way relationship between agricultural and non-agricultural components of landscapes.	3 Dimensions		+
65	-	Research	Soil Management	Tillage Practices	No till vs conventional tilling	The impacts of no till practice on soil organic carbon	The quantity of additional organic carbon in soil under no-till is relatively small: in large part apparent increases result from an altered depth distribution. The larger concentration near the surface in no-till is generally beneficial for soil properties that often, though not always, translate into improved crop growth.	1 Dimension		±
66	Mexico	Research	Integrated Management	Conservation Agriculture	Conventional Agriculture vs Conservation Agriculture	Impacts of conservation agriculture (reduction in tillage, retention of adequate levels of crop residues and soil surface cover and use of crop rotation) compared to conventional agriculture (tillage, monoculture and residue removal) on productivity and net returns of maize.	Under dry conditions, Conservation Agriculture (CA) resulted in higher yields and net returns per hectare as early as the first and second years after adoption by farmers. As an average of 27 plots under farmers’ management in 2009, the maize yields were 26% higher under CA (6.3 t/ha) than under CP (5.0 t/ha). CA had an overall positive effect of 3838 Mexican Pesos/ha (320 $US/ha).	1 Dimension	Positive outcomes in extreme conditions	+
67	France	Research	Integrated Management	Integrated Agricultural Systems	Conventional vs Integrated	Impact of diversified mixed crop-livestock farming on farm income and N balance	1. Inter-season crops leads to a TGM increase of €13/ha (+1.9%) compared to the current situation thanks to the savings. Meanwhile, nitrogen surplus (NS) is reduced by 5.9 kg N/ha/year and reaches −0.3 kg N/ha/year. 2. Fattening the heifers for direct or intermediary short-chain sale would respectively lead to a TGM increase of €114/ha (+17.6%) and €47/ha (+7.3%) compared to the baseline scenario…	2 Dimensions		+
68	China	Review	Soil Management	Tillage Practices	No till vs conventional tilling	Impacts of No till practice on soil organic carbon	NT can increase SOC concentration in the surface layer under dryland farming and rice (Oryza sativa L.) paddy soils. The average rate of increase of SOC (g kg-1year-1) in 0–20 cm depth under NT systems is 0.60-3.74, 0.14-4.15, 0.50-5.94, and 8.81-17.95 for the Northeast, North, Northwest, and paddy fields of Southern China, respectively. However, most research results indicate that SOC under NT i…	1 Dimension		±
69	-	Chapter	Integrated Management	Conservation Agriculture - Sustainable Intensification	CA vs Conventional - SI vs Conventional	Impacts of conservation agriculture (CA) and sustainable intensification (SI) on yields and environment	Most studies on the beneficial effects of CA for small landholders have addressed responses in yield, soil characteristics, oil water content, soil erosion and GHGs emissions - The benefits of SI practices for smallholder farmers can be diverse and similar to CA benefits because IPM and CA are integral components of SI	2 Dimensions		+
70	Cape Verde	Research	Soil Management	Amendments - Mulching Techniques	Conservation Agriculture vs Conventional Agriculture	Impacts of different sustainable agricultural practices on nutrients loss, runoff and crop yields (Control: conventional agriculture; T1: compost/manure + soil surfactant; T2: compost/animal or green manure + pigeon-pea hedges + soil surfactant; T3: compost/animal or green manure + mulch + pigeon-pea hedges)	In all treatments runoff had higher concentrations of NO3-N (2.20-4.83 mg/L) than of PO4-P (0.02-0.07 mg/L), and the eroded soil had higher content of PO4-P (5.27-18.8 mg/g) than of NO3-N (1.30-8.51 mg/g). The control had significantly higher losses of both NO3-N (5.4, 4.4 and 19 kg/ha) and PO4-P (0.2, 0.1 and 0.4 kg/ha) than the other treatments. T3 reduced soil loss, runoff and nutrient losses …	2 Dimensions		+
71	Mexico	Research	Crop Management	Residue Management	Conservation vs Conventional Agriculture	The impact of conservation agriculture	Crop residues are a major fodder source in Mexico, contributing up to 40% of fodder availability. Analysis indicates that retaining crop residues in-situ influences gross margins and that retention of roughly 45% of residues maximises gross margins in situations where opportunity costs for the use of crop residues exist.	1 Dimension		+
72	Burkina Faso - Mali - Niger - Senegal	Research	Landscape Management	Agroforestry	Agroforestry vs conventional	Impacts of effects of farmer managed natural regeneration on livelihoods	Trees on farms result in an increase in the gross income. Noticeable changes are also observed on the value of tree products, with an observed significant increase in the value of the products harvested from tree by about 34-38% among those actively practicing FMNR as compared to their counterparts. The results also lend support to the household resilience hypothesis of FMNR in that it leads to a…	1 Dimension		+
73	Senegal	Research	Integrated Management	Organic Agriculture	Organic vs conventional agriculture	Impacts of organic agriculture (OA) on gross margin and emissions on horticultural agriculture	The results indicate that the organic farming system will be economically more attractive to farmers in the Niayes compared with the conventional farming system only when a premium price is applied to organic crops. Simulation results also reveal that there exist a “win-win” situation for conventional farmers when they go for organic farming for certain types of crops. However, environmental resu…	2 Dimensions		±
74	-	Review	Soil Management	Tillage Practices	Conservation vs conventional tillage	Impacts of conservation tillage in different agro-ecological regions on the soil, the crop and the environment.	Research reports have identified several benefits of conservation tillage over conventional tillage (CT) with respect to soil physical, chemical and biological properties as well as crop yields.	2 Dimensions		+
75	Australia	Research	Crop Management	Crop Rotation	Rotation vs Conventional	The impacts on maize grown in rotations of wet-season peanut and dry-season maize (WPDM), compared to the conventional wet-season maize and dry-season peanut (WMDP)	Increased temperature caused a reduction in yield of both crops in both rotations. However, the overall yield advantage of WPDM increased from 41% to up to 53% compared with the industry-preferred sequence of WMDP under the worst climate projection. Increased temperature increased the irrigation requirement by up to 11% in WPDM, but caused a smaller reduction in total SOC accumulation and smaller…	2 Dimensions		+
76	Sub-Saharan Africa	Research	Knowledge Management	Indigenous Knowledge Systems	Indigenous vs conventional	Impacts of indigenous varieties on water productivity and yield	Indigenous varieties can grow under water-scarce conditions, and improve water productivity.	2 Dimensions		+
77	Netherlands	Research	Integrated Management	Internal Nutrient Cycling (INC)	INC vs. Conventional dairy farming	Impacts of Internal Nutrient Cycling (INC) on environments of dairy farms using an LCA	Results showed that both on-farm and off-farm nonrenewable energy use was significantly lower at INC farms as compared with regular farms. Although nearly all other environmental impacts were numerically lower, both on-farm and off-farm, differenceswere not statistically significant. Nitrogen losses to air and water decreased by on average 5 to 10% when INC farming would be implemented for the wh…	2 Dimensions	LCA Approach	+
78	UK	Research	Genetic Management	Crop Diversity	Diversity vs pure line	The effects of increased genetic diversity in winter wheat on grain yield, grain quality, and yield stability in different cropping environments. Line mixtures (intermediate level of diversity), and lines crossed with each other in composite cross populations (CCPn, high diversity).	CCPn and mixtures out-yielded the mean of the parents by 2.4% and 3.6%, respectively. Yield stability measured by environmental variance was higher in CCPn and mixtures than the mean of the parents.	1 Dimension		+
79		Research	Integrated Management	Integrated Agricultural Systems	Integrated vs Good management practice vs conventional	The impacts of two different crop-livestock farming on systems' sustainability	Good management practices produce slight environmental improvement compared to conventional while integrated systems have the best environmental results. Profitability is improved in both systems but only integrated systems reduce economic risks and improve farm autonomy. While social aspects are not clearly improved in good management practices, integrated systems improve multifunctionality and …	3 Dimensions	Qualitative method	+
80	Canada	Research	Soil Management	Tillage Practices - Crop Rotation	Conservation Agriculture vs Conventional Agriculture	Impacts of Conservation agriculture practice on yields and nutrient efficiency. Seven maize and soybean rotations with different frequency of winter wheat with or without underseeded red clover (Trifolium pratense L.) were grown in two tillage systems (conventional and zone-tillage) and four long-term N regimes.	The benefits of wheat in the rotation on maize yield were negated by high N rates; however, similar yields were obtained with lower N levels in rotationally grown maize, resulting in a 17% (conventional till) to 21% (zone-till) increase in partial factor productivity for N fertiliser. N benefits to crops following wheat alone may be attributed to a higher indigenous plant available soil N, unders…	2 Dimensions		+
81	Senegal	Research	Crop Management	Intercropping	Intercropping vs sole cropping	Impacts of native shrub intercropping on soil chemical and microbial properties of mango rhizosphere soil	The results showed that mango-shrub interplanting significantly lowered pH, and increased arbuscular mycorrhizal fungi (AMF) colonisation of mango roots, enzyme activities, and microbial biomass compared to mango alone. Phylogenetic analyses by PCR-denaturing gradient gel electrophoresis (DGGE) showed that community structures of fungi, bacteria, and bacterial genes responsible for denitrificatio…	1 Dimension		+
82	Bolivia	Research	Landscape Management	Agroforestry	Agroforestry vs monoculture	This study assesses agroecosystem resilience under three different cocoa cultivation systems (successional agroforestry, simple agroforestry and common practice monocultures), using eight indicators: soil organic matter, depth of Ah horizon, soil bulk density, tree species diversity, crop varieties diversity, ant species diversity, cocoa yields and infestation of cocoa trees with Moniliophthora p…	Agroecosystem resilience was higher under the two agroforestry systems than under common practice monoculture, especially under successional agroforestry. Both agroforestry systems achieved higher cocoa yields than common practice monoculture due to agroforestry farmers’ enhanced knowledge regarding cocoa cultivation.	2 Dimensions		+
83	Bolivia	Research	Integrated Management	Organic Agriculture	Organic vs conventional agriculture	This study assesses resilience of organic cocoa farming systems compared to conventional systems, using eight indicators: soil organic matter, depth of Ah horizon, soil bulk density, tree species diversity, crop varieties diversity, ant species diversity, cocoa yields and infestation of cocoa trees with Moniliophthora perniciosa.	Organic farms had a higher tree and crop diversity, higher yields and incomes, more social connectedness, and participated in more courses on cocoa cultivation.	3 Dimensions	Qualitative method	+
84	Zimbabwe	Research	Knowledge Management	Indigenous Knowledge Systems	-	Impacts of IK in weather forecast on agricultural resilience	Results showed that the use of IKS in local farming communities for weather forecast is an effective way of building coping and adaptation strategies (i.e. designing crop choices, planting dates and agronomic practices).	1 Dimension		+
85	India	Research	Crop Management	Crop Rotation	Crop Rotation vs Conventional	Impacts of alternate groundnut (Arachis hypogaea L.) farming practices for rainfed kharif (South-west monsoon) and irrigated rabi (winter) cropping seasons for on yields, farm income as well as nitrous oxide (N2O) emissions with current baseline practices among regional small scale farm-holders.	Alternate practices including application of locally prepared fermented manures along with a 40-60 % reduction in application of total N increased pod yield by 50 and 35 % and net profit by ≈120 and ≈70 % in a drought-hit kharif and an irrigated rabi, respectively. High resolution field measurements of N2O flux indicate that the seasonal emission factors for groundnut cultivation using baseline a…	2 Dimensions	Positive outcomes in extreme conditions	+
86	-	Review	Integrated Management	Integrated Agricultural Systems	-	Impacts of integrated crop-grassland systems on productivity and environment	Integrated crop–livestock systems are an appropriate strategy to enhance diversity. Sod-based rotations can temporally and spatially capture the benefits of leys for minimising environmental impacts, while still maintaining periods and areas of intensive cropping. Long-term experimental results illustrate the potential of such systems to sequester C in soil and to reduce and control N emissions t…	2 Dimensions		+
87	Iran	Research	Integrated Management	Organic Agriculture	Organic vs conventional	Impact of OA on social risks	The results of the study revealed that there are serious ambiguities and risks associated with OA	1 Dimension	Qualitative method	-
88	USA	Report	Crop Management	Cover Crop - Crop Rotation	cover crop/rotation vs conventional	Impacts of cover crops on rotational soybean, on soil quality	Cover crop on rotational soybean reduces soil erosion, reduces soil compaction and controls weeds on soybean farms.	1 Dimension	Qualitative method	+
89	-	Review	Soil Management	Tillage Practices	No till vs conventional tilling	A global meta-analysis to evaluate the influence of various crop and environmental variables on no-till relative to conventional tillage yields.	No-till yields matched conventional tillage yields for oil seed, cotton, and legume crop categories. Among cereals, the negative impacts of no-till were smallest for wheat (−2.6%) and largest for rice (−7.5%) and maize (−7.6%). No-till performed best under rainfed conditions in dry climates, with yields often being equal to or higher than conventional tillage practices.Yields in the first 1–2 yea…	1 Dimension		±
90	-	Review	Integrated Management	Integrated Pest Management	IPM vs Conventional	Impacts of IPM projects on productivity and reliance on pesticides	Results showed a mean yield increase across projects and crops of 40.9%, combined with a decline in pesticide use to 30.7% compared with baseline (conventional agriculture). A total of 35 of 115 (30%) crop combinations resulted in a transition to zero pesticide use.	2 Dimensions		+
91	Burkina Faso	Research	Knowledge Management	Meteorological Information		Impact of meterological information management to improving productivity for pastoralists	The results demonstrate that a mobile phone has large potential to facilitate informal information flows between pastoralists and to reduce losses susbtantially.	1 Dimension	Qualitative method	+
92	Australia	Research	Integrated Management	System of Crop Intensification (SCI)	rotational grazing vs continuous grazing	Impacts of rotational grazing on productivity and SOC	rotational grazing showed a significant positive trend in terms of productivity but mean SOC stocks (0-30 cm) showed no differences between grazing management categories.	2 Dimensions		±
93	India	Research	Soil Management	Tillage Practices	Conventional vs Zero till	Impacts of zero-till (ZT) systems on yields and farm income, adaptation to heat and water stresses and reduction in GHGs emissions	Results show that ZT substantially reduces the production cost (up to 23%) but produces equal or even higher than conventional systems; thereby increasing economic profitability of production systems. ZT systems also moderated the effect of high temperature (reduced canopy temperature by 1-4°C) and increased irrigation water productivity by 66-100% compared to conventional production systems thus…	2 Dimensions		+
94	Italy	Research	Crop Management	Intercropping	Intercropping vs sole cropping	The impacts of a newly introduced legume-based intercropping system is able to ameliorate the biological fertility status of an arable soil in a way that is still noticeable during the succeeding durum wheat cropping season in terms of changes in bacterial community structure, soil C and N pools, and crop yield.	Results showed that even though the microbial biomass was significantly altered, the preceding legume intercrops stimulated C-related functional variables thus leading to an increased release of mineral N, which was larger in crop treatments succeeding pea-based than faba bean-based intercropping. The increased N made available in soil enabled the succeeding durum wheat to achieve an adequate gra…	2 Dimensions		+
95		Research	Integrated Management	Integrated Agricultural Systems	Integrated biogas-OA vs OA	Impacts of integrated biogas-OA systems on nitrogen dynamics, crop yield, product quality, crop rotations, weeds, plant health, and soil fertility.	Through biogas integration organic farms may contribute to renewable energy supply without additional need for land, while simultaneously increasing food output and reducing greenhouse gas emissions from livestock manure.	2 Dimensions		+
96	South Africa	Research	Integrated Management	Conservation Agriculture	Conservation Agriculture vs Conventional Agriculture	The effect of different conservation agriculture (CA) systems on maize grain yield was studied across four countries in southern Africa. Maize yield data was obtained from plots under no-tillage as well as from conventionally tilled plots. Crop residues were retained in no-till plots, whereas they were removed from conventional tillage plots in line with current farmer practices. Rotations or int…	In the majority of cases (80%), yield responses from a range of CA systems were greater than those of the conventional control plot at the respective site. In 20% of the cases there was a negative response to CA, due to lack of experience by farmers in the initial year, slow increase in soil fertility at the respective site and waterlogging in some years with too much rainfall. Yield benefits inc…	1 Dimension		+
97		Research	Crop Management	Plant Bio-Regulators	endophytic fungus vs conventional	The effect of endophytic fungus on building resistance of rice to heat-stress	Endophytic fungus produce phytohormones which protect the rice plants from HS compared with controls	1 Dimension		+
98	China	Review	Integrated Management	System of Crop Intensification (SCI)	SRI vs Conventional	Impacts of SRI on yields and environmental performances	Results indicate that SRI methods have been increasing rice yield in comparison trials with current improved practices by more than 10 %. These higher yields are being attained with reduced field requirements for irrigation water and with much–reduced seed rates. This can lower farmers’ costs of production and enhance their net income from rice. Such benefits are accompanied by other advantages r…	2 Dimensions		+
99	Israel	Research	Soil Management	Amendments		The study assesses biochar potential to improve infiltration and control soil erosion	In the non-calcareous loamy sand, 2 % biochar was found to significantly increase final infiltration rate (FIR) by 1.7 times, and significantly reduce soil loss by 3.6 times, compared with the 0 % biochar control. These effects persisted throughout a second rainfall simulation, and were attributed to an increase in soil solution Ca and decrease in Na, and a subsequently decreased sodium adsorptio…	1 Dimension		+
100	-	Research	Crop Management	Plant Bio-Regulators	biostimulant vs no biostimulant	Impacts of natural plant growth-promoting substances on yield of sorghum	The results revealed that exogenous application of moringa leaf extract (MLE) at 3% concentration (priming plus foliar application, priming alone, foliar spray alone) significantly enhanced the yield through improvement in sorghum growth.	1 Dimension		+
101	Canada	Research	Soil Management	Amendments	Organic vs Inorganic amendments	The impacts of organic (solid food waste and mill biosolid compost) vs inorganic amendments on yields and N uptake	Soil amendments had significant impacts on potato yields when compared to control but not when compared to inorganic fertilisation. Averaged across years, total tuber yields were in the order; inorganic (34.2 Mg ha-1) > solid food waste (29.6 Mg ha-1) > control (26.5 Mg ha-1). Total potato N uptake (TNU) levels were 89, 115 and 147 kg N ha-1, respectively, for control, MSW and FERT	2 Dimensions		±
102	India	Research	Integrated Management	System of Crop Intensification (SCI)	SCI vs Conventional	Impacts of SCI on wheat yields and water productivity	Irrigation water productivity was highest in SWI method as compared to conventional line sowing (irrigation water 60 mm higher under conventional practice). The result of experiments suggests that the adoption of SWI method by maintaining appropriate plant spacing and nutrient management could greatly enhance wheat production.	1 Dimension		+
103	USA	Research	Crop Management	Intercropping	Intercropping vs sole cropping	Impacts of intercropping on biomass annual grass and legumes	Biomass production of the legume monocultures was lower than the grass monocultures and intercrops at both sampling dates. All intercrops had land equivalent ratios (LERs) greater than one, indicating complementarity, likely a result of resource partitioning. Intercrops, particularly the four-species mixture, exhibited greater stability in yields across environments. The pearl millet–sorghum suda…	1 Dimension		+
104		Research	Crop Management	Plant Growth Promoting Microbes		The effect of inoculation of the bacterial endophyte Bacillus subtilis strain B26 on growth, water status, photosynthetic activity and metabolism of timothy	Exposure of inoculated plant to a 8-week drought-stress led to significant increase in shoot and root biomass by 26.6 and 63.8%, and in photosynthesis and stomatal conductance by 55.2 and 214.9% respectively, compared to non-inoculated plants grown under similar conditions. There was a significant effect of the endophyte on plant metabolism; higher levels of several sugars, notably sucrose and fr…	1 Dimension	Positive outcomes in extreme conditions	+
105	Zambia	Chapter	Integrated Management	Conservation Agriculture	CA vs Conventional	Impacts of conservation agriculture on economics of farming practice in Zambia	CA is economically attractive especially when it allows farmers to overcome labour constraints during planting by distributing land preparation labour during the dry season. The results also show that when all three principles of CA are implemented, farmers will likely have more stable and higher yields than conventional tillage.	1 Dimension		+
106	Denmark	Research	Integrated Management	Intercropping - Cover Crop	Intercropping vs sole cropping	Impacts of intercropping on productivity and carbon footprint of perennial grass–forage legume systems with high or low nitrogen fertiliser input	Based on biomass yields across a 2-year rotation, the present study shows that low N input legume based forage production systems provide a balanced alternative to highly N-fertilised conventional systems. In terms of a theoretical carbon footprint analysis the low N input systems presented a 40–50% reduction compared to the high N input system.	2 Dimensions	LCA Approach	+
107	-	Communication	Crop Management	Plant Growth Promoting Microbes	microbial mutualism vs conventional	Impacts of microbial mutualism on production and resistance to abiotic and biotic stresses	Mutualistic microbes can contribute to plant health, can help increase crop production and reduce yield losses via increases in: 1. the efficiency of plant resource up take (e.g. N, water), 2. plant tolerance of abiotic stress (e.g. salt), 3. plant tolerance of biotic stress (e.g. pathogens).	2 Dimensions		+
108	Rwanda	Research	Crop Management	Intercropping	Intercropping vs sole cropping	To evaluate intercropping and sole cropping systems against farmers’ criteria for success: yield, market value, contribution to nutritional quality, and land-use efficiency.	The improved intercropping system tends to outperform the government-mandated system of alternating sole-cropped bean and maize season-by-season, on all four of the criteria tested.	2 Dimensions		+
109	Pakistan	Research	Integrated Management	Water Saving - Mulching Techniques	water saving vs conventional - Mulch vs no mulch	Impacts of alternate wetting and drying (AWD) and aerobic rice (AR) on farm economic returns.	Although the mulching increased the cost of production for AWD and AR, the gross income of these systems was also improved significantly.	1 Dimension		+
110	Bangladesh	Research	Integrated Management	Integrated Agricultural Systems	integrated vs conventional	The impacts of integrated rice-shrimp farming on productivty and soil salinity	Results show that with current management practices, the rice/shrimp system is economically more viable (higher returns to land and labour and less risky) than the rice/non-rice system.	1 Dimension		+
111	Kenya	Research	Integrated Management	Tillage Practices - Intercropping		Effects of tillage and cropping systems on maize and beans yield	Intercropping reduced the seasonal means of bean grain yields (P < 0.05) with a 54 % decrease by intercropping (0.73 Mg ha-1) compared to the sole bean (1.6 Mg ha-1). Thus, the Disc Ploughing (DP) and Disc Ploughing and Harrowing (DPH) improved crop yield and yield components and can be recommended as tillage practices in the semi-arid region.	1 Dimension		±
112	Nepal	Research	Genetic Management	Crop Diversity	High diversity vs low diversity	Impacts of high crop diversity on household food self-sufficiency.	Results show that in the Humla District, families with greater crop diversity were more self-sufficient. In contrast, farmers in Makwanpur, who have already established a high degree of crop diversity based on vegetable production, do not benefit from additional crop diversity in terms of their ability to provide for themselves. Finally, data from Sarlahi show that families’ food selfsufficiency …	1 Dimension	Qualitative method	+
113	China	Review	Soil Management	Tillage Practices	No till vs conventional tilling	Impacts of No till practice on soil organic carbon, productivity and yield stability	Results show that the difference of total SOC stocks between NT and CT decreased with soil depth, confirming that the SOC benefits of NT are concentrated to the immediate topsoil still subject to direct seeding. The topsoil achieved maximum SOC stocks after about 10 years of NT. Crop yields from NT increased by up to 20% for years with average and below average precipitation, demonstrating the ad…	2 Dimensions		+
114	-	Conference	Genetic Management	Cultivar Diversity	Cultivar diversity vs mono cultivar	Impacts of variety mixtures on disease control and yield stabilisation	The main results show that variety mixtures have advantages in terms of disease control and yield stabilisation and performance of mixtures may be affected by various factors	2 Dimensions		+
115	South Korea	Research	Soil Management	Amendments - Mulching Techniques	Integrated rice-fish farming vs Rice monoculture	Impacts of split fertiliser application (SF), winter cover crop cultivation (CC), and a combination of the two (SFCC) to major dryland crops (cabbage, potato, radish and soybean) on sediments and nutrients transportation and crop yields compared to baseline (BL).	The SF scenario reduced nitrate pollution while sediment and crop yield did not change relative to the baseline (BL) scenario. The application of the CC scenario reduces both sediment and nitrate load while crop yields increased. The combination of split fertilisation and cover cropping (SFCC) showed the highest positive effect on reducing sediment and nitrate and increasing crop yields compared …	2 Dimensions		+
116	-	Review	Integrated Management	Integrated Agricultural Systems	integrated vs conventional	The impact of three different forms of crop-livestock integration (local coexistence (A), complementarity (B) and synergy (C)) on soil fertility and biological regulation services	Benefits of A: ±; Benefits of B: +; Benefits of C: ++	1 Dimension		±
117	Lithuania	Research	Soil Management	Amendments - Crop Rotation		Changes in the biogenic elements in the soil of the organic cropping systems where farmyard manure, red clover aftermath for green manure or combinations of both had been used for winter wheat fertilisation and in the soil of the sustainable cropping systems where winter wheat had received organic fertilisation supplemented with mineral fertilisers.	The NPK balance was negative in the organic cropping system in the soil with both low and moderate levels of soil humus when only green manure had been used as fertiliser for winter wheat. The NP balance was strongly positive and K was significantly in excess in the organic cropping system when the green manure had been used in combination with 40 Mg/ha of farmyard manure. A marked reduction in t…	1 Dimension		+
118	Japan	Research	Genetic Management	Crop Diversity		Impacts of crop diversity on productivity and resilience	Crop diversity increases productivity during normal periods, a normal regime, while it decreases the productivity during periods exposed to disturbances such as extreme weather events and disease and insect damage, an adverse regime. Further, we find that crop diversity enhances the agro-ecosystem resilience.	2 Dimensions	Negative outcomes in extreme conditions	±
119	South Africa - Mozambique	Research	Soil Management	Tillage Practices	Reduced tillage (ripper) vs Conventional	The impacts of ripper tilling on soil water content, compared to conventional tilling	Ripper had 17-29% more soil water than conventional practice during flowering and grain filling maize growth stages.	1 Dimension		+
120	Zimbabwe	Research	Soil Management	Amendments	Manure vs unmanured	Impacts manure application on the growth and yield of four crops (maize, sorghum, millet and groundnut) in different landscape positions.	Manure increased yield of sorghum grown in upland and maize grown in lower lowlands.	1 Dimension		+
121	Tropics	Review	Landscape Management	Agroforestry	conventional agriculture vs agroforestry vs forest	Impacts of agroforestry on biodiversity	Many, but not a majority, of studies reported significantly higher biodiversity in agroforestry compared to agriculture. However, a majority of studies indicated significantly reduced diversity in agroforests compared to reference forests, so biodiversity preservation is far from complete and agroforestry cannot be viewed as a perfect substitute for forest protection.	1 Dimension		±
122	Mexico	Research	Integrated Management	Integrated Agricultural Systems	low density silvopastoral vs high density silvopastoral	Impacts of trees intensity on biodiversity and carbon fixation of silvopastoral systems: Low Tree Density (LTD) and High Tree Density (HTD)	Average richness per grazing unit for the LTD strategy was 7.2 species, and for HTD strategy it was 12.7 species. Average basal area for LTD was 1.7 m2 ha-1, and for HTD 3.8 m2 ha-1. Finally, the average level of fixed carbon for LTD was 2.12 mg ha-1, and for HTD 4.89 mg ha-1.	1 Dimension		+
123	-	Review	Integrated Management	Conservation Agriculture - Organic Agriculture - Crop Diversification - Crop Rotation	Organic vs conventional - Conservation vs conventional	The impacts of organic agriculture and conservation agriculture on yields compared to conventional agriculture	organic to conventional yield comparisons from 115 studies collected in 38 countries over a span of 35 years: comparing organic and industrial yields found that organic yields were approximately 15.5% to 22.9% lower than industrial yields. Different crop types (e.g., cereals, fruits and nuts, vegetables) and crop species responded differently to organic management. Significantly, incorporating di…	1 Dimension		±
124	-	Review	Crop Management	Plant Bio-Regulators		Impacts of plant bioregulators on resistance to abiotic and biotic stresses and productivity	Almost all of the bioregulators assessed had positive impacts on drought, heat and salt resistance and on yield improvement	2 Dimensions	Positive outcomes in extreme conditions	+
125	Kenya	Research	Integrated Management	Soil Water Conservation systems (SWC)	SWC vs no SWC	Impacts of soil water conservation systems (e.g. trenchs, mounds and undisturbed grounds) on SOM-related properties	the establishment of SWC structures in this erosion-prone landscape resulted in the recovery of SOM levels comparable to those observed in neighboring semi-natural ecosystems. Sites under conventional agriculture practices contained 20 Mg C/ha (0.85 m), while sites with SWC measures and those hosting semi-natural vegetation stored above a third more.	1 Dimension		+
126	USA	Research	Integrated Management	Integrated Agricultural Systems	integrated vs agroforestry	This study evaluated how a model aquaculture-managed forest plantation could (1) provision fish and woody biomass; (2) regulate carbon, groundwater infiltration, and groundwater quality; and (3) support nutrient cycling over a two-year period.	The aquaculture operation produced ~3.5Mg of fish and trees yielded 5.9 Mg/ha/yr of oven-dry biomass, sequestered 2.9 Mg carbon (C) ha-1 yr-1 and stored 0.028 Mg nitrogen (N) ha-1 yr-1. Biomass productivity, carbon storage, and nitrogen storage differed significantly among the evaluated Populus genotypes. Land application of pondwater increased groundwater infiltration by 60% relative to the prev…	2 Dimensions		+
127	Nicaragua	Research	Landscape Management	Agroforestry	pasture vs agroforestry vs secondary forest trees	Study the relationships between plant diversity (including species richness, phylogenetic diversity, and natural resource diversity), and soil quality within pasture, agroforests, and secondary forests, three common land use types.	We found that agroforestry sites tended to have higher surface soil %C, %N, and pH relative to neighboring to secondary forest, while maintaining comparable plant diversity. In contrast, pasture reduced species richness, phylogenetic diversity, and natural resource diversity.	1 Dimension		+
128	South Africa	Review	Soil Management	Tillage Practices	Conservation Tillage vs Plow Tillage	Impact of conservation tillage on maize yields compared to conventional plow tillage	This review demonstrated that conservation tillage can have substantial positive benefits on yields in South Africa.	1 Dimension		+
129	USA	Review	Integrated Management	Integrated Agricultural Systems	integrated vs conventional	Impacts of integrated forage-livestock management on soil erosion and GHGs emission	Permanent cover of forage plants is highly effective in reducing soil erosion, and ruminants consuming only grazed forages under appropriate management result in more C sequestration than emissions.	1 Dimension		+
130	India	Chapter	Soil Management	Tillage Practices	No till vs reduced tillage vs conventional tilling	Impacts of No till practice (NT), reduced till (RT) and conventional tilling on soil physical properties	The higher the intensity of tillage the bigger is the deterioration of soil physical properties, therefore, reduced tilling improved soil physical properties in general and the highest improvement was observed under no till: Bulk density (g/cm3) … NT>RT>CT ... Mean weight diameter of soil aggregrates (mm) ... NT>RT>CT ... Soil Moisture Content (%) ... NT<RT<CT ... Soil Penetration Resistance (k P…	1 Dimension		+
131	-	Review	Landscape Management	Traditional Systems	Terracing vs non Terracing	Impacts of terracing on ecosystem services (ES)	Results indicated that ESs provided by terracing was generally positive because the mean values of δ were mostly greater than one. The most prominent role of terracing was found in erosion control (11.46 ± 2.34), followed by runoff reduction (2.60 ± 1.79), biomass accumulation (1.94 ± 0.59), soil water recharge (1.20 ± 0.23), and nutrient enhancement (1.20 ± 0.48). Terracing, to a lesser extent, …	3 Dimensions	Qualitative method	+
132	Sub-Saharan Africa	Chapter	Integrated Management	Climate-Smart Agriculture		Impacts of climate-smart agriculture	Climate-smart agriculture (CSA) as an approach that can be adopted to increase agricultural productivity and incomes in environmentally and socially sustainable ways, enhance farmers’ resilience and mitigate climate change in sub-Saharan Africa (SSA).	1 Dimension		+
133	-	Review	Soil Management	Amendments	Biochar vs no amendments	Impact of biochar amendment on productivity and soil health	Biochar application improves soil biophysical and chemical properties as well as nutrient supply to plants and consequently plant growth and yield increase.	2 Dimensions		+
134	-	Review	Integrated Management	Cover Crop - Agroforestry		Impacts of perennial grass, cover crops and agroforestry on the components of water balance and ecological dynamics	Agricultural practices that promote “continuous living cover,” such as perennial grasses, agroforestry and cover crops, can improve water management relative to annual crop systems. Such practices ensure living roots in agricultural systems throughout the year and offer an approach to agroecosystem design that mimics ecological dynamics of native perennial vegetation.	1 Dimension		+
135	Vietnam	Research	Integrated Management	Integrated Agricultural Systems	rice-fish vs rice	Impacts of integrated rice-fish farming on productivity and chemical input use	Yield reduction in integrated rice-fish farming was compensated by fish yields, at the same time, fertiliser use was reduced between 15 and 35%, and pesticides use have been almost halved	2 Dimensions		+
136	USA	Research	Soil Management	Tillage Practices	No till vs conventional tilling vs chemical free tillage	Effects of tillage system on greenhouse gas fluxes and soil mineral nitrogen in wheat-fallow (no-till (NT), conventional tillage (CT, four tillage operations), and chemical-free (CF, six tillage operations))	No-till best mitigated GHG emissions and accumulation of mineral N, emitting 25%-30% less nitrous oxide, 35% less carbon dioxide fluxes and retaining twice as much soil nitrate compared with CT and CF during drought in the summer of 2012. Net GWP and GHGI in NT were 32%-35% and 43% lower than in CT, respectively. NT was the only management system that maintained negative net GWP and GHGI values d…	1 Dimension	Positive outcomes in extreme conditions	+
137	-	Research	Integrated Management	Integrated Agricultural Systems	rice-fish vs rice	Impacts of integrated rice-fish farming on productivity resources and inputs use	Shrimp-rice agroecosystems exhibit several synergistic effects between systems components that result in efficient resource use and enhanced production, whilst avoiding negative environmental impacts. Integrated cropping enhances agrobiodiversity and reduces dependence on external inputs (agrochemicals, feed and fertiliser). Diversified shrimp-rice culture produces a valuable export crop, stimula…	2 Dimensions		+
138	South-East Asia	Review	Integrated Management	Conservation agriculture	Conservation vs Conventional	Impacts of conservation agriculture (reduced- and no-tillage, crop residue addition, FYM incorporation, and integrated nutrient management) on soil quality and productivity	No-tillage increased soil aggregation, improved other soil properties, and favorably influenced SOC accretion. Effects of crop residue addition are often observed when it was integrated with reduced-tillage systems or with improved nutrient management. Applications of N fertilisers with FYM and crop residues increased stubble and root biomass yield, and improved SOC accumulation, in some cases up…	2 Dimensions		+
139	-	Review	Integrated Management	Integrated Agricultural Systems	integrated vs conventional	The resilience of Integrated Agricultural Systems (IAS)	Yield, revenue, profit, and yield variance were all used to demonstrate resilience and integration was overwhelmingly (n = 17/24) associated with increased climate resilience. the IAS-climate resilience links demonstrated were not generalisable across units of analysis, spatiotemporal scale, and from autonomous to directed integration	3 Dimensions	Qualitative Review	+
140	Bolivia-Peru	Research	Knowledge Management	Knowledge Sharing		impact of knowledge sharing on income generation and farmer livelihoods	Results demonstrate that knowledge‐sharing on agronomic practices, on benefits derived from consumption, and improving Andean Grain quality had a positive impact on income generation and farmer livelihoods.	1 Dimension		+
141	-	Review	Soil Management	Tillage Practices	-	Impact of tillage intensity on Soil Organic Carbon: No till, intermediate and high tillage intensity (NT, IT, HT)	SOC concentration was significantly higher in NT relative to both IT [1.18 g/kg ± 0.34 (SE)] and HT [2.09 g/kg ± 0.34 (SE)] in the upper soil layer (0–15 cm). IT was also found to be significant higher [1.30 g/kg ± 0.22 (SE)] in SOC concentration than HT for the upper soil layer (0–15 cm). At lower depths, only IT SOC compared with HT at 15–30 cm showed a significant difference; being 0.89 g/kg […	1 Dimension		+
142	Africa	Review	Crop Management	Intercropping	intercropping vs monoculture	Impact of intercropping on productivity in Africa	Sorghum–cowpea intercropping studies in the semi-arid regions of Burkina Faso reduced run-off losses of soil by 20–30% compared with sorghum monoculture and by 45–55% compared with cowpea monoculture. The benefits vary with rainfall intensity and the crop combinations adopted	1 Dimension		+
143	USA	Review	Crop Management	Cover Crop	CC vs Conventional	Impacts of cover crop on soil erosion, gases emission and climate change mitigation	Three key outcomes from this synthesis are (1) Cover crop effects on greenhouse gas fluxes typically mitigate warming by ~100 to 150 g CO2 e/m2/year, which is higher than mitigation from transitioning to no-till. The most important terms in the budget are soil carbon sequestration and reduced fertiliser use after legume cover crops. (2) The surface albedo change due to cover cropping, calculated …	1 Dimension	Positive outcomes in extreme conditions	+
144	Canada	Research	Integrated Management	Conservation Agriculture	CA vs Conventional	Impacts of conservation agriculture (rotation, reduced tillage, cover crop) on energy use efficiency of potato crop	Potato under conservation agriculture (5 yrs rotation) produced the highest energy use efficiency	1 Dimension		+
145	-	Research	Biodiversity Management	Ecological Intensification	EI vs Conventional	Impact of Ecological Intensification on pollinators	Ecological Intensification can contribute to mitigating the drivers of pollinator decline	1 Dimension		+
146	USA	Research	Soil Management	Tillage Practices - Crop Rotation	Rotation vs Continuous - Conventional Tillage vs Conservation Tillage	Impacts of rotation (fallow and crops) and conservation tillage on winter wheat (WW) yields	In low rain years receiving <350 mm precipitation yr-1, WW yields declined when preceded by crops rather than summer fallow, which [the fallow] was effective at mitigating low nitrogen (N) fertilisation efficiencies. Nevertheless, WW yields were greater when preceded by pulses and oilseeds rather than wheat across a range of yield potentials, and when under conservation tillage practices at low y…	1 Dimension	Positive outcomes in extreme conditions	+
147	Southern Africa	Research	Integrated Management	Sustainable Practices	SAP vs conventional	Farm-level adoption of Sustainable Agriculture Practices (SAP) and their effects on maize productivity, crop income and food adequacy	The baseline results show a positive association between the outcome variables (the logarithm of maize output, crop income and food adequacy) and the adoption of SAPs.	1 Dimension	econometric model	+
148	Zimbabwe	Research	Integrated Management	Tillage Practices - Mulching Techniques - Amendments		Tillage and mulching with manure and fertiliser application, improved soil mineral N release, plant N uptake and maize yields in cropping systems on poor soils in semi-arid Matobo, Zimbabwe.	Plough tillage stimulated N mineralisation by 4–19 kg N ha-1 and maize N uptake 13–23% more than the ripper tillage. When mulch was added to the plough tillage, mineralisation was slowed resulting in less crop N uptake (by 5–19%) compared with no mulch application. N uptake was highest in the manure treatments.	1 Dimension		±
149	Zimbabwe	Research	Soil Management	Tillage Practices	Reduced tillage (ripper) vs Conventional	Impact of different tillage practices on yields in different Agro-Ecoregions (AEs)	In the high (750-1000 mm per annum) and low (450-650 mm) rainfall AEs, conventional practice and Conservation Agriculture (CA) systems gave similar maize grain yield. Under medium rainfall conditions (500–800 mm) planting basins, rip-line and direct seeding systems gave 547, 548 and 1690 kg ha-1 more maize yield than the conventional practice. In the high and low rainfall AEs, conventional practi…	1 Dimension	Positive outcomes in extreme conditions	+
150	India	Research	Landscape Management	Agroforestry	Agroforestry vs Forest vs Conventional agriculture	Proportional contribution of forests, agriculture and agroforestry for fuelwood, fodder and organic fertiliser for the smallholders in the Himalayan mountainous region	The analysis of the data indicates the important contribution of agroforestry to household welfare providing 42 % of fuelwood, 36 % of fodder and 56 % of leaf manure, the remaining requirements fulfilled from forests, which is ways better than conventional agriculture which provides 2.5 % of fuelwood, 0.3 % of fodder and 20.2 % of leaf manure and compared to forests which provide 55 % of fuelwood…	2 Dimensions		+
151	Sub-Saharan Africa	Review	Crop Management	Crop Rotation	Fallow vs Conventional	Impacts of improved fallow on productivity and soil quality	The growing literature showed that improved fallows increased soil carbon sequestration and reduced greenhouse emissions and can increase maize yields to about 6 t ha-1, which is comparable to conventional maize yields under fertilisation.	2 Dimensions		+
152	India	Research	Crop Management	Crop Rotation	Crop Rotation vs Monoculture	Impacts of diversified crop rotations on crop and water productivity and energy use	All combinations of crop rotation showed better results compared to the control (monoculture). Cowpea–potato–mungbean (C–P–Mb) system proved as best viable option in realising highest system-productivity in terms of mungbean-equivalent-yield (MEY), water-productivity and energy-relationships besides enhancing soil physico-chemical and microbiological properties; followed by Kharif onion–wheat–mun…	2 Dimensions		+
153	-	Review	Crop Management	Intercropping	intercropping vs monoculture	Impact of intercropping (IC) on productivity and yield stability	The analysis showed that cereal-grain legume IC (CV = 22.1) significantly increased yield stability compared with the respective grain legume sole crops (CV = 31.7). Moreover, compared with the respective cereal and legume sole crops, IC in the cereal-grain legume systems gave higher yield stability than IC in the non-cereal-grain legume systems. Compared with the respective cereal (CV = 25.3) an…	1 Dimension		+
154	-	Review	Landscape Management	Trees Plantation	-	Impact of trees and forest in agrosystems on income and livelihood	when incorporating forests and trees within an appropriate and contextualised natural resource management strategy, there is potential to maintain, and in some cases, enhance yields comparable to solely monoculture systems. Furthermore, this review has illustrated the potential of achieving net livelihood gains through integrating trees on farms, providing rural farmers with additional income sou…	2 Dimensions	Review study	+
155	-	Review	Crop Management	Crop Rotation	ley-arable system vs continuous maize	Impacts of ley-arable maize systems compared to continous maise on yields, use efficiency of N and N uptake	Ley-arable system reduced insignificantly the yields (173100 Kg DM/ha vs 177500 Kg DM/ha for continous maize), however, it remarkebly improved N efficiency (226 Kg DM/Kg N vs 109 Kg DM/Kg N for continous maize) and N content in the forrage (9.7% vs 9% for continuous maize)	2 Dimensions		±
156	-	Review	Water Management	Water Saving	Water saving vs conventional	The impact of different water saving practices on water saving	Soil Management (No till, mulching): 13-54% of water saving ……. Irrigation application management (sprinkler, drip, sub-surface): 6-100% of water saving …… Crop and vegetation management: 17-100% of water saving	1 Dimension		+
157	Bolivia	Research	Integrated Management	Agroforestry - Organic Agriculture	Agroforestry vs monoculture - Organic vs conventional	This paper describes the only long-term field trial worldwide comparing different cocoa production systems under conventional and organic management. The factors (i) crop diversity (monoculture vs. agroforestry), (ii) management practice (conventional vs. organic)	Results showed significantly faster development of trunk circumferences in monocultures (+21%) compared to AFs. Cocoa yields were 47% lower in the organic compared to the conventional monoculture. In the Agroforestry (AFs), however, the organic-conventional yield gap was less pronounced (-16%) and statistically insignificant. The cumulative yields of all products harvested were significantly high…	1 Dimension		+
158	-	Review	Integrated Management	Organic Agriculture	Organic vs conventional	Impacts of organic agriculture on sustainability of agro-systems	Organic agriculture has some clear benefits and promising characteristics, for example, its positive influence on local biodiversity, high productivity in some circumstances, or a livelihood for poor farmers in some situations. However, many unresolved questions and concerns remain, such as N availability and the total land area required, accessibility, and influence on N losses from the system. …	3 Dimensions	Qualitative method from different research results	±
159	India	Research	Soil Management	Amendments	Amended vs Unamended - Organic vs Inorganic Amendment	Impacts of different soil amendments and rates on soil quality	Results from the study revealed that in the control treatment, where no manure or chemical fertiliser was applied, the bulk density was highest. Soil organic C and nitrogen stocks changed positively across the fertiliser and manure treatments over the control. In the control plot, at 0–15 cm depth the soil carbon and nitrogen stock was 15.1 and 1.77 Mg ha-1 , respectively which increased to the 1…	1 Dimension		+
160	-	Review	Integrated Management	Organic Agriculture	Organic vs Conventional	Impacts of organic agriculture on productivity, environmental health, economic viability, and quality of life	Despite evidence for lower yields in organic crop systems, we found considerable evidence for environmental and social benefits.	3 Dimensions		±
161	-	Review	Integrated Management	System of Crop Intensification (SCI)	SCI vs Conventional	Impact of Systems of Crop Intensification (SCI) on rice productivity soil quality and health and emissions in the air	SCI improves rice productivity and farmers' income, activates soil biota which simulates root expansion, reduced methane and nitrous oxide emission and increases crop resistance to diseases and extreme weather conditions	2 Dimensions	Qualitative method - Positive outcomes in extreme conditions	+
162	-	Review	Integrated Management	System of Crop Intensification (SCI)	SRI vs Conventional	Impacts of Systems of Rice Intensification (SRI) on yield and inputs use	SRI produce more food with less seed (lower plant density), less water, less fertiliser and agrochemicals, and often less labour. Lowering costs raises farmers’ incomes by more than their production increases. With SRI, reductions are made also in climate change impacts and greenhouse gas emissions.	2 Dimensions		+
163	-	Book	Soil Management	Mulching Techniques	Mulch vs No Mulch	Impact of Mulching on soil water regime, soil quality and health and on yields	Mulching controls soil thermal and soil moisture regimes (evaporation, infiltration and water retention), controls runoff and erosion, and participates in soil structural improvement (increase soil biological activity, soil chemical and physical structure).	2 Dimensions	The effect of mulches on crop growth response depends upon the combination of climate, type of crop and soil.	±
164	-	Chapter	Soil Management	Amendments		Biochars' (BC) effects on rice yield, soil acidity, GHG emissions, and bioavailability of Cadmium and Plomb.	Compared to the control, the BCs increased soil pH and rice yield by 11.8% (medium E +: 0.436 to 0.439) and 16% (large E +: 0.790 to 0.883), respectively. Applying BCs derived from different feedstocks and pyrolysis temperatures reduced N2O emissions from rice paddies (large E −: − 0.692 to − 0.863). The BCs produced at 550–600°C reduced the GHG emission with medium to large negative effects (E −…	2 Dimensions		+
165	Canada	Research	Landscape Management	Trees Plantation	integrated trees vs monoculture	The impacts of windbreak trees on productivity of bush bean (Phaseolus vulgaris L.) and potato (Solanum tuberosum L.) intercrops grown over a two-year period in two sites.	Intercrops grown in the windbreak-lined site produced significantly greater (p < 0.05) yields and biomass than the open site.	1 Dimension		+
166	Italy	Research	Biodiversity Management	Functional Agrobiodiversity		The impact of functional agrobiodiversity on some ecosystem services	Positive correlation between functional agrobiodiversity and weed supression and organic pest control	1 Dimension		+
167	Guatemala	Research	Biodiversity Management	Agroecology	Agroecology vs Conventional	The impact of agroecology on productivity and income	Agroecology-based farmers have higher levels of food availability than semiconventional ones during both dry and rainy seasons. The former produce 27% more plant varieties during the dry season and 62% more so during the rainy season than the latter. In fact, agroecological farmers make also more agricultural income during both seasons (46% in the dry season and 78% in the rainy one) than their s…	1 Dimension		+
168	-	Review	Soil Management	Amendments	Organic vs Inorganic vs Mixed	The effects of the use of organic amendments (OA) and OA + inorganic fertiliser (IF) on soil nutrient fertility and crop yields.	The overall effect of OA alone on yield was significant when compared with the nil control, but not when compared with the standard control. Only when OA and IF were added to soils that met specific conditions (low initial fertility, sandy texture, near-neutral pH values, under tropical climate) they rendered a significantly greater yieldf than the corresponding standard controls. The continuous …	2 Dimensions		±
169	Argentina	Research	Crop Management	Crop Rotation		The impact of diversifying crop rotations on functional composition and diversity of the heterotrophic soil bacterial communities.	Results revealed that crop rotation affects soil metabolic bacterial diversity and activity (P ≤ 0.05). The most diverse rotation (four different crops) had also the most diverse and active soil microbial biota, concomitantly with a higher plant biomass production and soil pH.	1 Dimension		+
170	India	Research	Integrated Management	System of Crop Intensification (SCI)	SRI vs Conventional	Impacts of systems of rice intensification on productivity and farmers' income	The average rice productivity under Modifed System of Rice Intensification (MSRI) was enhanced by 39% than that under the current Farmers' Practice (FP). The employment and net returns were enhanced by 15 and 61% over FP, respectively. Adoption of MSRI also increased water-use efficiency by 12% and WP by 59% compared to FP. The rice crop under MSRI matured 15 days earlier than that under FP. Thus…	2 Dimensions		+
171	Tropics	Review	Crop Management	Intercropping	Intercropping vs Monoculture	Impact of intercropping on on-farm diversity	Appropriate intercropping systems can help to strike a balance between farm-level productivity, crop resilience, and environmental health.	3 Dimensions		+
172	France	Research	Genetic Management	Crop Diversity	mixed seeds vs mono-seeded	The effects of the number of winter wheat varieties (Triticum aestivum) on aboveground arthropods and particularly predatory species.	The number of wheat varieties had a weak, but positive effect on predator abundance, notably spider abundance. In contrast, wheat functional diversity, as assessed by the number of wheat functional groups, was only negatively related to the diversity of spiders.	1 Dimension	Qualitative Method	±
173	Ethiopia	Research	Landscape Management	Agroforestry		The impacts of agroforestry on productivity and livelihood	The retention of forests in agricultural landscapes, and the use of these forests for livestock grazing and fuelwood collection, may promote sustainability, greater resilience and equality of smallholder farming systems, without compromising on-farm productivity.	2 Dimensions		+
174	China	Research	Soil Management	Amendments	Biochar vs no amendments	The influence of biochar on soil carbon pools	Application of biochar increased OC by 37%, 42%, and 76% in soil particle-size fractions of 53–250, <53, and 250–2,000 μm, respectively.	1 Dimension		+
175	West Africa	Research	Genetic Management	Crop Diversity		The impacts of crop diversity on yields and soil quality	Analysis shows that crop associations between cereals and legumes or between perennials and annuals, have overall positive effects on soil characteristics and often improve crop yields.	2 Dimensions		+
176	-	Chapter	Crop Management	Plant Growth Promoting Microbes		Impacts of microbial application on nutrient cycling, and plant resistance to biotic and abiotic stress	PGPR enhance plant growth through direct and indirect mechanisms, which involve enhancing plant physiology and resistance to different phyto-pathogens through various modes and actions. These include nutrient fixation, neutralising biotic and abiotic stress, and producing volatile organic compounds (VOCs) and enzymes to prevent disease. However, the mode of action of different types of PGPR varie…	3 Dimensions	Review study	+
177	Philippines	Research	Integrated Management	Organic Agriculture	Organic vs Conventional	Impact of organic rice systems on climate resilience	Results showed that organic rice systems in the case study are more climate resilient than their conventional counterparts.	1 Dimension		+
178	Pakistan	Research	Integrated Management	Climate-Smart Agriculture	CSA vs Conventional	Impacts of Climate-Smart Agriculture (CSA) on farm income and inputs and resources use efficiency	Results revealed that uniform germination, higher yield and financial returns, the concentration of inputs and increase in resource use efficiency are the main advantages of CSA.	2 Dimensions		+
179	Poland	Research	Integrated Management	Extensive Systems		The impact of extensive grassland systems on nitrate and phosphate reduction in the catchment scale.	There was no observed saturation effect in case of the two buffer zones that were receiving high nitrate load via subsurface flow. Highest nitrate concentration exceeded twice the level of 50 mg NO3/L, which is considered a threshold level of water pollution status by the EU Nitrates Directive. Concentrations above 100 mg NO3/L were reduced by 68% and 99% passing through the 25 m and 45 m of gras…	1 Dimension		+
180	China	Research	Soil Management	Amendments	Inorganic vs Mixed	The impacts of organic and inorganic amendments on average yields of maize and soybean, soil nutrient availability, SOC and total porosity	Mixed amendment (organic + inorganic) showed better results than control and solely inorganic amendments. Control (0 manure, 0 NPK): maize 5351 Kg/ha; soybean 1793 Kg/ha …. SOC: 26.2 g/Kg ... Porosity: 59.4% …. Inorganic Fertiliser (0 manure, NPK): maize 7085 Kg/ha; soybean 1968 Kg/ha … SOC: 27.7 g/Kg … Porosity: 58.7% …. Mixed (22.5 T/ha manure, NPK): maize 8132 Kg/ha; soybean 2417 Kg/ha ... SOC…	2 Dimensions		+
181	China	Research	Soil Management	Amendments	Biochar vs no amendments	The impacts of different biochar sources on soil quality and health	Incubation experiments were conducted for 6 weeks with three acidic soils: Alfisol, Ultisol, and Oxisol. Three biochars were derived from chicken manure (CMB), pig manure (PMB), and peat moss (PB) at 400 °C and applied at 1 or 2% (wt/wt). The addition of the three biochars increased Olsen-P in the three acidic soils in the following order: CMB > PMB > PB. Application of 2% CMB increased Olsen-P c…	1 Dimension		+
182	-	Review	Crop Management	Plant Growth Promoting Microbes	-	Impact of Plant Growth Promoting Rizobacteria (PGPR) on yield and stress resilience	PGPR involved in the synthesis of phytohormones viz. GA, ABA and cytokinin, which in turn enhance plant weight and ultimately yield by activating plant growth and N accessibility in the rhizosphere. Other PGPR strains involved in the synthesis of stress responsive plant metabolites. Plant growth promoting properties of PGPR strains in various crops have been evident. Bacterial inoculants have bee…	2 Dimensions	Positive outcomes in extreme conditions	+
183	China	Research	Integrated Management	Conservation Agriculture	CA vs Conventional	The impacts of Conservation Agriculture (CA) on farm economy and risk. The The current study examined the wheat-pea rotation for a combination of tillage and stubble practices. This examination included two treatments within the experiment: the current practice of conventional tillage with stubble removal; and no-tillage with stubble retention.	The difference in average yield between CA and the current practice was generally positive in dry, normal, and wet seasons: Averaged across the nine experimental years, grain yields were 1379.8 kg ha-1 in the current practice and 1650.2 kg ha-1 in the CA system. The average and median yield benefit of using CA compared with the current practice in dry seasons was 29% and 32%, in normal seasons wa…	1 Dimension		+
184	Ethiopia	Research	Landscape Management	Traditional Systems	Terracing vs non Terracing	The impact of terracing and bunds on yields and their potential to mitigate the effects of climate change.	It is shown that at the national level, terraced plots have slightly lower yields than non-terraced plots. However, data support the hypothesis that terraced plots acted as a buffer against the 2015 Ethiopian drought, while contour bunds did not.	1 Dimension	Positive outcomes in extreme conditions	±
185	Taiwan	Research	Soil Management	Amendments	Biochar vs no amendments	Impacts of wood biochar (WB) application mixed with a green waste dreg compost (GWC) on runoff quality, soil losses, and agricultural productivity	Results showed that the WB application not only effectively increased soil pH, soil organic carbon (SOC) and exchangeable K+ but also increased the production of rape plants. Significant reduction of runoff and the increases of inorganic nitrogen (IN) and total phosphorus (TP) were found in the WB-treated soil. Compared to the control, the co-application of WB and GWC, particularly for the WB at …	2 Dimensions		+
186	-	Review	Soil Management	Amendments	Organic vs Inorganic vs Mixed	The impacts of soil amendments on crop yields, the soil organic carbon (SOC) and total nitrogen (TN) contents, soil nutrient dynamics and biological properties.	Organic amendments increased crop yields on average of 27% than mineral-only fertilisation. Farmyard manure (FYM) had the highest effect (49% increase) and this was especially clear in wheat croplands (40% increase). Organic amendment increased the amount of SOC (38%), TN (20%), microbial biomass carbon (MBC; 51%) and microbial biomass nitrogen (MBN; 24%) than mineral-only fertilisation. Organic …	2 Dimensions		+
187	South Africa	Review	Integrated Management	Conservation Agriculture	CA vs Conventional	The impacts of conservation agriculture (CA) on soil quality, GHGs emissions and productivity of sorghum in South Africa	CA enhanced soil quality, reduced carbon dioxide emissions, and increased yield of sorghum and related cereals.	2 Dimensions		+
188	-	Chapter	Integrated Management	System of Crop Intensification (SCI)	Land Use intensification	The impact of land use intensification on social and ecological outcomes	There are relatively few cases in which land use intensification is clearly succeeding in these twinned objectives. There are many more cases in which, for example, short-term income or productivity gains from land use intensification are resulting in long-term diminution of biodiversity and ecosystem services. Studies with longer-term perspectives are already seeing how such trade-offs are leadi…	2 Dimensions		-
189	Spain	Research	Water Management	Water Saving - Unconventional Water	hydroponic vs soil cultivation - Freshwater vs Seawater	The impacts of hydroponic agriculture with seawater irrigation on energy consumption and greenhouse gas emissions	Specific energy consumption increased in hydroponic by 17% compared to soil cultivation (3.61 MJ kg-1 versus 4.23 MJ kg-1) production. Specific greenhouse gas emissions were notably lower for the hydroponic system (0.11 kg CO2eq kg-1) compared to those in the soil cultivation (0.23 kg CO2eq kg-1)	1 Dimension		±
190	-	Review	Integrated Management	Organic Agriculture	Organic vs Conventional	Impact of organic agriculture on environment and food security	In terms of environmental and climate change effects, organic farming is less polluting than conventional farming when measured per unit of land but not when measured per unit of output. Organic farming is not the paradigm for sustainable agriculture and food security	2 Dimensions		-
191	China	Research	Integrated Management	Sustainable Intensification	SI vs conventional	Impacts of sustainable intensification on maize yield and gas emissions	Grain yield in sustainble Intensification maize systems achieved 93% of the yield potential and averaged 14.8 Mg ha-1, 70% higher than the conventional farmers practice. the optimal N rate was 250 kgN ha-1, which is only 38% more than that in the conventional farmers practice. As a result, N surplus in high-yielding systems was around zero. More importantly, environmental costs which was expresse…	2 Dimensions		+
192	-	Review	Landscape Management	Agroforestry	Agroforestry vs Conventional	Impacts of agroforestry in cacao production on some ecosystem services	Agroforestry for cacao production gives optimum light conditions for cacao growth, provides water and nutrient cycling and regulating services such as pest and disease control and climate regulation.	1 Dimension		+
193	Southern Africa	Chapter	Integrated Management	Conservation Agriculture	Conservation vs Conventional	Impacts of conservation agriculture on productivity and soil health and quality in southern africa	In the study countries CA has improved yields (productivity), infiltration and soil moisture, soil organic carbon (SOC; physicochemical factors), and reduced weed pressure, pests, and diseases (biotic factors)	2 Dimensions		+
194	-	Review	Integrated Management	Amendments - Cover Crop - Crop Rotation		Impacts of different alternative vegetable production practices on soil health	Soil amendments generally improved soil chemical and nutrient indices of health—soil carbon levels and nitrogen reserves in particular. Incorporation of cover crops to vegetable crop rotations tended to improve nitrogen recycling via reduced nitrate leaching risks, increased soil carbon levels, and weed suppression. Reduced tillage systems were rare, presenting an important challenge and opportun…	2 Dimensions		+
195	Canada	Research	Soil Management	Amendments	Biochar vs no amendments	Impacts of pine sawdust biochar on greenhouse gas (GHG) emissions in soils. Biochar was produced at 300 and 550 °C with and without steam activation.	Application of BC550 significantly reduced cumulative CO2 emission from the forest soil by 16.4% relative to the control (without biochar application), but not from the grassland soil. Biochar application did not have significant effects on CH4 uptake from either soil. Application of BC550 and BC550-S reduced the cumulative N2O emission by 27.5 and 31.5%, respectively, in the forest soil and 14.8…	1 Dimension		+
196	India	Research	Integrated Management	Conservation Agriculture	CA vs Conventional	The impacts of CA systems on crop yield, and profitability compared to conventional farmers' practices. The Conseravation agricultural practices included: conventional tillage with sole cropped maize using line sowing of the improved maize cultivar ‘Nilesh’ (CT-M); conventional tillage with maize intercropped with the improved cowpea (Vigna unguiculata L. cultivar ‘Hariyalli Bush’) (CT-M + C); re…	Results showed that reduced tillage combined with maize-cowpea intercropping (MT-M + C) followed by mustard residue retention had higher system productivity and net benefits, an increase of 200% and 230%, respectively over FP. Under regulatory ecosystem services, the soil quality was assessed through calculation of soil quality index (SQI) which was highest under MT-M + C followed by mustard resi…	1 Dimension		+
197	-	Review	Crop Management	Cover Crop	Cover Crop vs Conventional	Impacts of new-generation cover crop on soil quality and yield	Cover crops imparted weed and pathogen control and decreased soil erosion and loss of soil nitrogen, phosphorus and carbon, while plant-beneficial microbes provided disease control and phosphorus fertility. However, yield in these next-generation crop production systems at best approximated that associated with current production systems.	2 Dimensions		±
198	Zambia	Research	Crop Management	Crop Rotation - Intercropping	Rotation vs Conventional - Intercropping vs Monoculture	Impacts of rotation and intercropping on access to food and income generation	Results suggest that cereal-legume rotation was associated with statistically significant increases in production of calories and protein by a household as well as their gross value of crop sales; it may also improve their food access. In contrast, we found little evidence of statistically significant effects of cereal-legume intercropping and other forms of legume production on household food av…	2 Dimensions		±
199	India	Research	Water Management	Water Harvesting		The impact of rainwater harvesting practices on crop intensity and productivity, and groundwater level	Rainwater harvesting and its judicious utilisation through farm ponds and community tanks in rainfed districts demonstrated the ability to build resilience and also enhance cropping intensity (20–135%). Construction of temporary check dams (bori-bandhan) in high-rainfall areas brought lowland areas into cultivation which otherwise would have remained fallow due to inundation in the kharif (monsoo…	2 Dimensions		+
200	Kenya	Research	Integrated Management	Conservation Agriculture	CA vs Conventional	The impact of Conservation Agriculture on soil organic carbon sequestration	CA did not increase SOC, but only slowed down its the loss over time.	1 Dimension		-
201	Philippines	Research	Landscape Management	Traditional Systems		The impacts of traditional terracing in water management	results quantitatively reaffirm the effectiveness of well-maintained agricultural terraces in regulating water resources by enhancing groundwater recharge.	1 Dimension		+
202	Sub-tropics and tropics	Review	Integrated Management	Conservation Agriculture		The impacts of conservation agriculture on (1) the relative maize yield with increasing drought and temperature stress; (2) the moisture and temperature stress exposure interact; (3) the interaction between moisture and temperature stress and soil texture; and (4) agricultural performance with crop diversification, fertiliser application rate, or the time since no-till implementation under climat…	The relative maize yield performance of conservation agriculture improves with increasing drought severity or exposure to high temperatures. Further, there is an interaction of moisture and heat stress on conservation agriculture performance and their combined effect is both non-additive and modified by soil clay content. found only limited support for our fourth hypothesis as (1) increasing nitr…	2 Dimensions	Positive outcomes in extreme conditions	±
203	China	Research	Crop Management	Intercropping	intercropping vs monoculture	The effects of rainfall stress up on the soil microbial food web in three planting systems: a monoculture of the focal species Zanthoxylum bungeanum and mixed cultures of Z. bungeanum and Medicago sativa or Z. bungeanum and Glycine max.	The nematode community did not fully recover in the monoculture or Z. bungeanum and M. sativa treatments, while nematode populations in the combined Z. bungeanum and G. max treatment were indistinguishable from controls.	1 Dimension		+
204	Italy	Research	Integrated Management	Conservation Agriculture	CA vs conventional	The impacts of conservation agriculture on dry matter (DM) yield, forage quality, in terms of crude protein (CP) and metabolisable energy (ME), the nitrogen balance, agrochemical management, the energy balance and efficiency, labour use, economic budgets, and carbon footprint of two italian forage systems	The adoption of conservation agriculture increased overall system efficiency (increased Dry Matter DM, Crude Protein CP and Metabolisable Energy yields per hectare), reduced reliance on external inputs (chemical N and pesticides), led to a more equilibrated N balance, reduced agrochemical use intensity and potential ecotoxicological impacts, increased energy use efficiency and reduced carbon foot…	2 Dimensions		+
205	Germany	Research	Soil Management	Amendments	Biochar vs no amendments	The effect of wood-based biochar on two different textured soils and to evaluate their influence on some hydrological properties: water retention, shrinkage behavior and the effect of wetting and drying periods on the hydraulic conductivity.	Biochar amendments increased water retention in the coarse textured sand compared to the unamended soil. Pore size distribution was significantly altered in the sandy substrate, reducing the fraction of wide coarse pores and increasing meso porosity. Repeated wetting and drying cycles enhanced the structural stability of the pore system increasing the saturated hydraulic conductivity. Soil rigidi…	1 Dimension		+
206	China	Research	Soil Management	Amendments		The impact of Biochar amendment on emergy, energy, and economic benefits of rice and wheat production	The results indicated contrasting differences in these emergy values between biochar-amended and unamended production systems over the 6 years. The overall emergy efficiency of rice and wheat productions in biochar-amended system were higher by 11-28 and 15-47%, respectively, than that of unamended one of which the production being highly resource intensive. Moreover, the Emergy Sustainability In…	2 Dimensions		+
207	Africa	Research	Genetic Management	Crop Diversity	crop diversity vs monovariety	The impact of crop diversity on household food security	Households with greater farming diversity are more successful in meeting their consumption needs, but only up to a certain level of diversity per ha cropland	1 Dimension		+
208	USA	Research	Soil Management	Amendments	Biochar vs no amendments	Impact of Biochar Amendment on soil bacterial community composition and microbial assemblage patterns in perennial grass and maize	The influence of biochar amendment on the soil community is dependent on soil type. Soil bacterial communities are most responsive to biochar in Oxisol soils. Biochar increases complexity of microbial networks in Oxisol soils. Biochar increases microbial community resistance to environmental perturbations.	1 Dimension		±
209	West Africa	Chapter	Water Management	Water Saving	Conservation vs Conventional	Impact of water conservation practices (i.e. contour stone bunds, Zaï, Half-Moons) on soil water status and erosion control	On-farm research has shown that stone bunds are efficient in increasing soil water status and in reducing soil erosion and downward particle transport. The technique is particularly efficient in reducing runoff and improving rainwater infiltration and therefore increasing crop productivity. zaï and half-moons can combat land degradation and improve productivity of these sealed and crusted bare so…	2 Dimensions		+

## Sheet: Appendix II
No	Year	References of documents exclusively included in the systematic review
1	1997	Reeves, D (1997). The role of soil organic matter in maintaining soil quality in continuous cropping systems. Soil and Tillage Research, 43 (1-2): 131-167. DOI: 10.1016/S0167-1987(97)00038-X
2	1999	Kumar K and Goh KM (1999). Crop Residues and Management Practices: Effects on Soil Quality, Soil Nitrogen Dynamics, Crop Yield, and Nitrogen Recovery. Advances in Agronomy, 68: 197-319. DOI: 10.1016/S0065-2113(08)60846-9
3	2001	Hulugalle NR, Entwistle PC, Scott F and Kahl J (2001). Rotation crops for irrigated cotton in a medium-fine, self-mulching, grey Vertosol. Australian Journal of Soil Research, 39 (2): 317-328. DOI: 10.1071/SR00035
4	2003	Lotter DW, Seidel R and Liebhardt W (2003). The performance of organic and conventional cropping systems in an extreme climate year. American Journal of Alternative Agriculture, 18 (3): 146-154. DOI: 10.1079/AJAA200345
5	2003	Rockström J (2003). Resilience building and water demand management for drought mitigation. Physics and Chemistry of the Earth, 28 (20-27): 869-877. DOI: 10.1016/j.pce.2003.08.009
6	2004	Denison RF, Bryant DC and Kearney TE (2004). Crop yields over the first nine years of LTRAS, a long-term comparison of field crop systems in a Mediterranean climate. Field Crop Research, 86 (2-3): 267-277. DOI: 10.1016/j.fcr.2003.08.014
7	2007	Allen VG, Bakerb MT, Segarrac E and Brown CP (2007). Integrated Irrigated Crop–Livestock Systems in Dry Climates. Agronomy Journal, 99 (2): 346-360. DOI: 10.2134/agronj2006.0148
8	2007	Komatsuzaki M and Ohta H (2007). Soil management practices for sustainable agro-ecosystems. Sustainability Science, 2 (1): 103-120. DOI: 10.1007/s11625-006-0014-5
9	2008	Di Falco S and Chavas J-P (2008). Rainfall shocks, resilience, and the effects of crop biodiversity on agroecosystem productivity. Land Economics, 84 (1): 83-96. DOI: 10.3368/le.84.1.83
10	2008	Ortiz R, Sayre KD, Govaerts B, Gupta R, Subbarao GV, Ban T, Hodson D, Dixon JM, Ortiz-Monasterio JI and Reynolds M (2008). Climate change: Can wheat beat the heat? Agriculture, Ecosystems & Environment, 126 (1-2): 46-58. DOI: 10.1016/j.agee.2008.01.019
11	2008	Triberti L, Nastri A, Giordani G, Comellini F, Baldoni G and Toderi G (2008). Can mineral and organic fertilization help sequestrate carbon dioxide in cropland? European Journal of Agronomy, 29 (1): 13-20. DOI: 10.1016/j.eja.2008.01.009
12	2009	IFOAM (2009). The contribution of organic agriculture to climate change mitigation. The International Federation of Organic Agriculture Movements (IFOAM).
13	2009	Pan G, Zhou P, Lia Z, Smith P, Lia L, Qiu D, Zhang X, Xu X, Shen S and Chen X (2009). Combined inorganic/organic fertilization enhances N efficiency and increases rice productivity through organic carbon accumulation in a rice paddy from the Tai Lake region, China. Agriculture, Ecosystems & Environment, 131 (3-4): 274-280. DOI: 10.1016/j.agee.2009.01.020
14	2009	Vohland K and Barry B (2009). A review of in situ rainwater harvesting (RWH) practices modifying landscape functions in African drylands. Agriculture, Ecosystems & Environment, 131 (3-4): 119-127. DOI: 10.1016/j.agee.2009.01.010
15	2010	Kędziora A (2010). Landscape management practices for maintenance and enhancement of ecosystem services in a countryside. Ecohydrology & Hydrobiology, 10 (2-4): 133-152. DOI: 10.2478/v10104-011-0006-7
16	2010	Scialabba NE-H and Müller-Lindenlauf M (2010). Organic agriculture and climate change. Renewable Agriculture and Food Systems, 25 (02): 158-169. DOI: 10.1017/s1742170510000116
17	2010	Smukler SM, Sánchez-Moreno S, Fonte SJ, Ferris H, Klonsky K, O'Geen AT, Scow KM, Steenwerth KL and Jackson LE (2010). Biodiversity and multiple ecosystem functions in an organic farmscape. Agriculture, Ecosystems and Environment, 139 (1-2): 80-97. DOI: 10.1016/j.agee.2010.07.004
18	2010	Snapp SS, Gentry LE and Harwood R (2010). Management intensity – not biodiversity – the driver of ecosystem services in a long-term row crop experiment. Agriculture, Ecosystems & Environment, 138 (3-4): 242-248. DOI: 10.1016/j.agee.2010.05.005
19	2011	Andersson JCM, Zehnder AJB, Rockström J and Yang H (2011). Potential impacts of water harvesting and ecological sanitation on crop yield, evaporation and river flow regimes in the Thukela River basin, South Africa. Agricultural Water Management, 98 (7): 1113-1124. DOI: 10.1016/j.agwat.2011.02.004
20	2011	Enfors E, Barron J, Makurira H, Rockström J and Tumbo S (2011). Yield and soil system changes from conservation tillage in dryland farming: A case study from North Eastern Tanzania. Agricultural Water Management, 98 (11): 1687-1695. DOI: 10.1016/j.agwat.2010.02.013
21	2011	Garg, KK, Karlberg L, Wani SP and Berndes G (2011). Jatropha production on wastelands in India: Opportunities and trade-offs for soil and water management at the watershed scale. Biofuels, Bioproducts and Biorefining, 5 (4): 410-430. DOI: 10.1002/bbb.312
22	2011	Kahlon MS and Lal R (2011). Enhancing Green Water in Soils of South Asia. Journal of Crop Improvement, 25 (2): 101-133. DOI: 10.1080/15427528.2011.542573
23	2011	Murgueitio E, Calle Z, Uribe F, Calle A and Solorio B (2011). Native trees and shrubs for the productive rehabilitation of tropical cattle ranching lands. Forest Ecology and Management, 261 (10): 1654-1663. DOI: 10.1016/j.foreco.2010.09.027
24	2011	Ryan J, Kapur S, Ibrikci H and Singh M (2011). Cultivation intensity in relation to organic matter and related properties in a Vertisol in southern Turkey. Journal of Sustainable Agriculture, 35 (6): 613-623. DOI: 10.1080/10440046.2011.586577
25	2011	Underwood T, McCullum-Gomez C, Harmon A and Roberts S (2011). Organic Agriculture Supports Biodiversity and Sustainable Food Production. Journal of Hunger and Environmental Nutrition, 6 (4): 398-423. DOI: 10.1080/19320248.2011.627301
26	2011	Verhulst N, Carrillo-García A, Moeller C, Trethowan R, Sayre KD and Govaerts B (2011). Conservation agriculture for wheat-based cropping systems under gravity irrigation: increasing resilience through improved soil quality. Plant and Soil, 340 (1): 467-479. DOI: 10.1007/s11104-010-0620-y
27	2012	Berg H, Berg C and Nguyen TT (2012). Integrated Rice-Fish Farming: Safeguarding Biodiversity and Ecosystem Services for Sustainable Food Production in the Mekong Delta. Journal of Sustainable Agriculture, 36 (8): 859-872. DOI: 10.1080/10440046.2012.712090
28	2012	de Vries FT, Bloem J, Quirk H, Stevens CJ, Bol R and Bardgett RD (2012). Extensive Management Promotes Plant and Microbial Nitrogen Retention in Temperate Grassland. PLoS ONE 7 (12): e51201. DOI: 10.1371/journal.pone.0051201
29	2012	Kremen C and Miles A (2012). Ecosystem services in biologically diversified versus conventional farming systems: Benefits, externalities, and trade-offs. Ecology and Society, 17 (4): 40. DOI: 10.5751/ES-05035-170440
30	2012	Srinivasarao Ch, Deshpande AN, Venkateswarlu B, Lal R, Singh AK, Kundu S, Vittal KPR, Mishra PK, Prasad JVNS, Mandala UK and Sharma KL (2012). Grain yield and carbon sequestration potential of post monsoon sorghum cultivation in Vertisols in the semi arid tropics of central India. Geoderma, 175-176: 90-97. DOI: 10.1016/j.geoderma.2012.01.023
31	2013	Abson DJ, Fraser EDG and Benton TG (2013). Landscape diversity and the resilience of agricultural returns: A portfolio analysis of land-use patterns and economic returns from lowland agriculture. Agriculture and Food Security, 2 (1): 2. DOI: 10.1186/2048-7010-2-2
32	2013	Arnés E, Antonio J, Del Val E and Astier M (2013). Sustainability and climate variability in low-input peasant maize systems in the central Mexican highlands. Agriculture, Ecosystems and Environment, 181: 195-205. DOI: 10.1016/j.agee.2013.09.022
33	2013	Atanga NL, Treydte AC and Birner R (2013). Assessing the sustainability of different small-scale livestock production systems in the Afar Region, Ethiopia. Land, 2: 726-755. DOI: 10.3390/land2040726
34	2013	Bellamy AS (2013). Banana production systems: Identification of alternative systems for more sustainable production. Ambio, 42 (3): 334-343. DOI: 10.1007/s13280-012-0341-y
35	2013	Branca G, Lipper L, McCarthy N and Jolejole MC (2013). Food security, climate change, and sustainable land management. A review. Agronomy for Sustainable Development, 33 (4): 635-650. DOI: 10.1007/s13593-013-0133-1
36	2013	Derbile EK (2013). Reducing vulnerability of rain-fed agriculture to drought through indigenous knowledge systems in north-eastern Ghana. International Journal of Climate Change Strategies and Management, 5 (1): 71-94. DOI: 10.1108/17568691311299372
37	2013	Dile YT, Karlberg L, Temesgen M and Rockström J (2013). The role of water harvesting to achieve sustainable agricultural intensification and resilience against water related shocks in sub-Saharan Africa. Agriculture, Ecosystems & Environment, 181: 69-79. DOI: 10.1016/j.agee.2013.09.014
38	2013	Enfors E (2013). Social-ecological traps and transformations in dryland agro-ecosystems: Using water system innovations to change the trajectory of development. Global Environmental Change, 23 (1): 51-60. DOI: 10.1016/j.gloenvcha.2012.10.007
39	2013	Ghimire R, Norton JB, Norton U, Ritten JP, Stahl PD and Krall JM (2013). Long-term farming systems research in the central High Plains. Renewable Agriculture and Food Systems, 28 (2): 183-193. DOI: 10.1017/S1742170512000208
40	2013	Ifejika Speranza, C (2013). Buffer capacity: Capturing a dimension of resilience to climate change in African smallholder agriculture. Regional Environmental Change, 13 (3): 521-535. DOI: 10.1007/s10113-012-0391-5
41	2013	Lalljee B (2013). Mulching as a mitigation agricultural technology against land degradation in the wake of climate change. International Soil and Water Conservation Research, 1 (3): 68-74. DOI: 10.1016/S2095-6339(15)30032-0
42	2013	Liebman M, Helmers MJ, Schulte LA and Chase CA (2013). Using biodiversity to link agricultural productivity with environmental quality: Results from three field experiments in Iowa. Renewable Agriculture and Food Systems, 28 (2): 115-128. DOI: 10.1017/S1742170512000300
43	2013	Mahanta D, Bhattacharyya R, Gopinath KA, Tuti MD, Jeevanandan K, Chandrashekara C, Arunkumar R, Mina BL, Pandey BM, Mishra PK, Bisht JK, Srivastva AK, Bhatt JC (2013). Influence of farmyard manure application and mineral fertilization on yield sustainability, carbon sequestration potential and soil property of gardenpea-french bean cropping system in the Indian Himalayas. Scientia Horticulturae, …
44	2013	Mekuria W, Getnet K, Noble A, Hoanh CT, McCartney M, Langan S (2013). Economic valuation of organic and clay-based soil amendments in small-scale agriculture in Lao PDR. Field Crops Research, 149: 379-389. DOI: 10.1016/j.fcr.2013.05.026
45	2013	Sanderson MA, Archer D, Hendrickson J, Kronberg S, Liebig M, Nichols K, Schmer M, Tanaka D and Aguilar J (2013). Diversification and ecosystem services for conservation agriculture: Outcomes from pastures and integrated crop-livestock systems. Renewable Agriculture and Food Systems, 28 (2): 129-144. DOI: 10.1017/S1742170512000312
46	2013	Srinivasarao Ch, Venkateswarlu B, Lal R, Singh AK and Kundu S (2013). Chapter Five - Sustainable Management of Soils of Dryland Ecosystems of India for Enhancing Agronomic Productivity and Sequestering Carbon. Advances in Agronomy, 121: 253-329. DOI: 10.1016/B978-0-12-407685-3.00005-0
47	2013	Stockdale EA, Banning NC and Murphy DV (2013). Rhizosphere effects on functional stability of microbial communities in conventional and organic soils following elevated temperature treatment. Soil Biology and Biochemistry, 57: 56-59. DOI: 10.1016/j.soilbio.2012.08.020
48	2013	Teklewold H, Kassie M, Shiferaw B and Köhlina G (2013). Cropping system diversification, conservation tillage and modern seed adoption in Ethiopia: Impacts on household income, agrochemical use and demand for labor. Ecological Economics, 93: 85-93. DOI: 10.1016/j.ecolecon.2013.05.002
49	2013	Yao R-J, Yang J-S, Zhang T-J, Gao P, Yu S-P and Wang X-P (2013). Short-term effect of cultivation and crop rotation systems on soil quality indicators in a coastal newly reclaimed farming area. Journal of Soils and Sediments, 13 (8): 1335-1350. DOI: 10.1007/s11368-013-0739-6
50	2013	Zhang B, Wang H, Yao S and Bi L (2013). Litter quantity confers soil functional resilience through mediating soil biophysical habitat and microbial community structure on an eroded bare land restored with mono Pinus massoniana. Soil Biology and Biochemistry, 57: 556-567. DOI: 10.1016/j.soilbio.2012.07.024
51	2014	Abraham B, Araya H, Berhe T, Edwards S, Gujja B, Khadka RB, Koma YS, Sen D, Sharif A, Styger E, Uphoff N and Verma A (2014). The system of crop intensification: reports from the field on improving agricultural production, food security, and resilience to climate change for multiple crops. Agriculture & Food Security, 3 (4): 12 p. DOI: 10.1186/2048-7010-3-4
52	2014	Alliaume F, Rossing WAH, Tittonell P, Jorge G and Dogliotti S (2014). Reduced tillage and cover crops improve water capture and reduce erosion of fine textured soils in raised bed tomato systems. Agriculture, Ecosystems and Environment, 183: 127-137. DOI: 10.1016/j.agee.2013.11.001
53	2014	Awada L, Lindwall CW and Sonntag B (2014). The development and adoption of conservation tillage systems on the Canadian Prairies. International Soil and Water Conservation Research, 2 (1): 47-65. DOI: 10.1016/S2095-6339(15)30013-7
54	2014	Bell LW, Moore AD and Kirkegaard JA (2014). Evolution in crop–livestock integration systems that improve farm productivity and environmental performance in Australia. European Journal of Agronomy, 57: 10-20. DOI: 10.1016/j.eja.2013.04.007
55	2014	Bonaudo T, Burlamaqui A, Bendahan BA, Sabatier R, Ryschawy J, Bellon S, Leger F, Magda D and Tichit M (2014). Agroecological principles for the redesign of integrated crop–livestock systems. European Journal of Agronomy, 57: 43-51. DOI: 10.1016/j.eja.2013.09.010
56	2014	Carsan S, Stroebel A, Dawson I, Kindt R, Mbow C, Mowo J and Jamnadass R (2014). Can agroforestry option values improve the functioning of drivers of agricultural intensification in Africa? Current Opinion in Environmental Sustainability, 6: 35-40. DOI: 10.1016/j.cosust.2013.10.007
57	2014	Fleming WM, Rivera JA, Miller A and Piccarello M (2014). Ecosystem services of traditional irrigation systems in northern New Mexico, USA. International Journal of Biodiversity Science, Ecosystem Services and Management, 10 (4): 343-350. DOI: 10.1080/21513732.2014.977953
58	2014	Hargreaves SK and Hofmockel KS (2014). Physiological shifts in the microbial community drive changes in enzyme activity in a perennial agroecosystem. Biogeochemistry, 117 (1): 67-79. DOI: 10.1007/s10533-013-9893-6
59	2014	Kloos J and Renaud FG (2014). Organic cotton production as an adaptation option in north-west Benin. Outlook on Agriculture, 43 (2): 91-100. DOI: 10.5367/oa.2014.0166
60	2014	Lechenet M, Bretagnolle V, Bockstaller C, Boissinot F, Petit M-S, Petit S, Munier-Jolain NM (2014). Reconciling pesticide reduction with economic and environmental sustainability in arable farming. PLoS ONE, 9 (6): e97922. DOI: 10.1371/journal.pone.0097922
61	2014	Martin-Gorriz B, Soto-García M and Martínez-Alvarez V (2014). Energy and greenhouse-gas emissions in irrigated agriculture of SE (southeast) Spain. Effects of alternative water supply scenarios. Energy, 77: 478-488. DOI: 10.1016/j.energy.2014.09.031
62	2014	McDaniel MD, Tiemann LK and Grandy AS (2014). Does agricultural crop diversity enhance soil microbial biomass and organic matter dynamics? A meta-analysis. Ecological Applications, 24 (3): 560-570. DOI: 10.1890/13-0616.1
63	2014	Pollnac FW, Smith RG and Warren ND (2014). Cultivar diversity as a means of ecologically intensifying dry matter production in a perennial forage stand. Ecosphere, 5 (9): 115. DOI: 10.1890/ES14-00139.1
64	2014	Pretty J and Bharucha ZP (2014). Sustainable intensification in agricultural systems. Annals of Botany, 114 (8): 1571-1596. DOI: 10.1093/aob/mcu205
65	2014	Powlson DS, Stirling CM, Jat ML, Gerard BG, Palm CA, Sanchez PA and Cassman KG (2014). Limited potential of no-till agriculture for climate change mitigation. Nature Climate Change, 4: 678-683. DOI: 10.1038/nclimate2292
66	2014	Romero-Perezgrovas R, Verhulst N, De La Rosa D, Hernández V, Maertens M, Deckers J and Govaerts B (2014). Effects of Tillage and Crop Residue Management on Maize Yields and Net Returns in the Central Mexican Highlands Under Drought Conditions. Pedosphere, 24 (4): 476-486. DOI: 10.1016/S1002-0160(14)60034-5
67	2014	Ryschawy J, Joannon J, Choisis JP, Gibon A and Le Gale PY (2014). Participative assessment of innovative technical scenarios for enhancing sustainability of French mixed crop-livestock farms. Agricultural Systems, 129: 1-8. DOI: 10.1016/j.agsy.2014.05.004
68	2014	Zhang, H-L, Lal R, Zhao X, Xue J-F and Chen F (2014). Opportunities and challenges of soil carbon sequestration by conservation agriculture in China. Advances in Agronomy, 124: 1-36. DOI: 10.1016/B978-0-12-800138-7.00001-2
69	2015	Ares A, Thierfelder C, Reyes M, Eash NS and Himmelstein J (2015). Global perspectives on conservation agriculture for small households. In: Chan C and Fantle-Lepczyk J (Eds.), Conservation Agriculture in Subsistence Farming: Case Studies from South Asia and Beyond. CAB International: 22-54.
70	2015	Baptista I, Ritsema C and Geissen V (2015). Effect of integrated water-nutrient management strategies on soil erosion mediated nutrient loss and crop productivity in cabo verde drylands. PLoS ONE, (7): e0134244. DOI: 10.1371/journal.pone.0134244
71	2015	Beuchelt TD, Camacho Villa CT, Göhring L, Hernández Rodríguez VM, Hellin J, Sonder K and Erenstein O (2015). Social and income trade-offs of conservation agriculture practices on crop residue use in Mexico’s central highlands. Agricultural Systems, 134: 61-75. DOI: 10.1016/j.agsy.2014.09.003
72	2015	Binam JN, Place F, Kalinganire A, Hamade S, Boureima M, Tougiani A, Dakouo J, Mounkoro B, Diaminatou S, Badji M, Diop M, Babou AB and Haglund E (2015). Effects of farmer managed natural regeneration on livelihoods in semi-arid West Africa. Environmental Economics and Policy Studies, 17 (4): 543-575. DOI: 10.1007/s10018-015-0107-4
73	2015	Binta ABA and Barbier B (2015). Economic and environmental performances of organic farming system compared to conventional farming system: A case study of the Horticulture sector in the Niayes region of Senegal. Procedia Environmental Sciences, 29: 17-19. DOI: 10.1016/j.proenv.2015.07.132
74	2015	Busari MA, Kukal SS, Kaur A, Bhatt R and Dulazi AA (2015). Conservation tillage impacts on soil, crop and the environment. International Soil and Water Conservation Research, 3 (2): 119-129. DOI: 10.1016/j.iswcr.2015.05.002
75	2015	Chauhan YS, Thorburn P, Biggs JS, Wright GC (2015). Agronomic benefits and risks associated with the irrigated peanut-maize production system under a changing climate in northern Australia. Crop and Pasture Science, 66 (11): 1167-1179. DOI: 10.1071/CP15068
76	2015	Chivenge P, Mabhaudhi T, Modi AT and Mafongoya P (2015). The Potential Role of Neglected and Underutilised Crop Species as Future Crops under Water Scarce Conditions in Sub-Saharan Africa. International journal of environmental research and public health, 12 (6): 5685-5711. DOI: 10.3390/ijerph120605685
77	2015	de Vries W, Kros J, Dolman MA, Vellinga TV, de Boer HC, Gerritsen AL, Sonneveld MPW and Bouma J (2015). Environmental impacts of innovative dairy farming systems aiming at improved internal nutrient cycling: A multi-scale assessment. Science of the Total Environment, 536: 432-442. DOI: 10.1016/j.scitotenv.2015.07.079
78	2015	Döring TF, Annicchiarico P, Clarke S, Haigh Z, Jones HE, Pearce H, Snape J, Zhan J and Wolfe MS (2015). Comparative analysis of performance and stability among composite cross populations, variety mixtures and pure lines of winter wheat in organic and conventional cropping systems. Field Crops Research, 183: 235-245. DOI: 10.1016/j.fcr.2015.08.009
79	2015	Duru M and Therond O (2014). Livestock system sustainability and resilience in intensive production zones: which form of ecological modernization? Regional Environmental Change, 15 (8): 1651-1665. DOI: 10.1007/s10113-014-0722-9
80	2015	Gaudin ACM, Janovicek K, Deen B and Hooker DC (2015). Wheat improves nitrogen use efficiency of maize and soybean-based cropping systems. Agriculture, Ecosystems and Environment, 210: 1-10. DOI: 10.1016/j.agee.2015.04.034
81	2015	Hernandez RR, Debenport SJ, Leewis M-CCE, Ndoye F, Nkenmogne KIE, Soumare A, Thuita M, Gueye M, Miambi E, Lydie C-L, Ibrahima D and Dick RP (2015). The native shrub, Piliostigma reticulatum, as an ecological “resource island” for mango trees in the Sahel. Agriculture, Ecosystems & Environment, 204: 51-56. DOI: 10.1016/j.agee.2015.02.009
82	2015	Jacobi J, Schneider M, Bottazzi P, Pillco M, Calizaya P and Rist S (2015). Agroecosystem resilience and farmers' perceptions of climate change impacts on cocoa farms in Alto Beni, Bolivia. Renewable Agriculture and Food Systems, 30 (2): 170-183. DOI: 10.1017/S174217051300029X
83	2015	Jacobi J, Schneider M, Pillco Mariscal M, Huber S, Weidmann S, Bottazzi P and Rist S (2015). Farm Resilience in Organic and Nonorganic Cocoa Farming Systems in Alto Beni, Bolivia. Agroecology and Sustainable Food Systems, 39 (7): 798-823. DOI: 10.1080/21683565.2015.1039158
84	2015	Jiri O, Mafongoya, PL, Chivenge P (2015). Indigenous knowledge systems, seasonal 'quality' and climate change adaptation in Zimbabwe. Climate Research, 66 (2): 103-111. DOI: 10.3354/cr01334
85	2015	Kritee K, Nair D, Tiwari R, Rudek J, Ahuja R, Adhya T, Loecke T, Hamburg S, Tetaert F, Reddy and Dava O (2015). Groundnut cultivation in semi-arid peninsular India for yield scaled nitrous oxide emission reduction. Nutrient Cycling in Agroecosystems, 103 (1): 115-129. DOI: 10.1007/s10705-015-9725-2
86	2015	Lemaire G, Gastal F, Franzluebbers A and Chabbi A (2015). Grassland–Cropping Rotations: An Avenue for Agricultural Diversification to Reconcile High Production with Environmental Quality. Environmental Management, 56 (5): 1065-1077. DOI: 10.1007/s00267-015-0561-6
87	2015	Mahmoudi H, Renn O, Hoffmann V, Van Passel S and Azadi H (2015). Social risk screening using a socio-political ambiguity approach: The case of organic agriculture in Iran. Journal of Risk Research, 18 (6): 747-770. DOI: 10.1080/13669877.2014.910696
88	2015	MCCC (2015). Integrating Cover Crops in Soybean Rotations: Challenges and Recommendations for the North Central Region. the Midwest Cover Crops Council (MCCC). 27 p.
89	2015	Pittelkow CM, Linquist BA, Lundy ME, Liang X, van Groenigen KJ, Lee J, van Gestel N, Six J, Venterea RT and van Kessel C (2015). When does no-till yield more? A global meta-analysis. Field Crops Research, 183: 156-168. DOI: 10.1016/j.fcr.2015.07.020
90	2015	Pretty J and Bharucha ZP (2015). Integrated pest management for sustainable intensification of agriculture in Asia and Africa. Insects, 6 (1): 152-182. DOI: 10.3390/insects6010152
91	2015	Rasmussen LV, Mertz O, Rasmussen K and Nieto H (2015). Improving how meteorological information is used by pastoralists through adequate communication tools. Journal of Arid Environments, 121: 52-58. DOI: 10.1016/j.jaridenv.2015.05.001
92	2015	Sanderman J, Reseigh J, Wurst M, Young M-A and Austin J (2015). Impacts of rotational grazing on soil carbon in native grass-based pastures in southern Australia(Article). PLoS ONE, 10 (8): e0136157. DOI: 10.1371/journal.pone.0136157
93	2015	Sapkota TB, Jat ML, Aryal JP, Jat RK and Khatri-Chhetric A (2015). Climate change adaptation, greenhouse gas mitigation and economic profitability of conservation agriculture: Some examples from cereal systems of Indo-Gangetic Plains. Journal of Integrative Agriculture, 14 (8): 1524-1533. DOI: 10.1016/S2095-3119(15)61093-0
94	2015	Scalise A, Tortorella D, Pristeria A, Petrovičová B, Gelsomino A, Lindström K and Monti M (2015). Legume–barley intercropping stimulates soil N supply and crop yield in the succeeding durum wheat in a rotation under rainfed conditions. Soil Biology and Biochemistry, 89: 150-161. DOI: 10.1016/j.soilbio.2015.07.003
95	2015	Siegmeier T, Blumenstein B and Möller D (2015). Farm biogas production in organic agriculture: System implications. Agricultural Systems, 139: 196-209. DOI: 10.1016/j.agsy.2015.07.006
96	2015	Thierfelder C, Matemba-Mutasa R and Rusinamhodzi L (2015). Yield response of maize (Zea mays L.) to conservation agriculture cropping system in Southern Africa. Soil and Tillage Research, 146 (PB): 230-242. DOI: 10.1016/j.still.2014.10.015
97	2015	Waqas M, Khan AL, Shahzad R, Ullah I, Khan AR and Lee I-J (2015). Mutualistic fungal endophytes produce phytohormones and organic acids that promote japonica rice plant growth under prolonged heat stress. Journal of Zhejiang University: Science B, 16 (12): 1011-1018. DOI: 10.1631/jzus.B1500081
98	2015	Wu W, Ma B and Uphoff N (2015). A review of the system of rice intensification in China. Plant and Soil, 393 (1-2): 361-381. DOI: 10.1007/s11104-015-2440-6
99	2016	Abrol V, Ben-Hur M, Verheijen FGA, Keizer JJ, Martins MAS, Tenaw H, Tchehansky L and Graber ER (2016). Biochar effects on soil water infiltration and erosion under seal formation conditions: rainfall simulation experiment. Journal of Soils and Sediments, 16 (12): 2709-2719. DOI: 10.1007/s11368-016-1448-8
100	2016	Ahmad W, Ali Noor M, Afzal I, Bakhtavar MA, Nawaz MM, Sun X, Zhou B, Ma W and Zhao M (2016). Improvement of Sorghum Crop through Exogenous Application of Natural Growth-Promoting Substances under a Changing Climate. Sustainability-Basel, 8 (12): 1330. DOI: 10.3390/su8121330
101	2016	Alam MZ, Lynch DH, Sharifi M, Burton DL and Hammermeister AM (2016). The effect of green manure and organic amendments on potato yield, nitrogen uptake and soil mineral nitrogen. Biological Agriculture and Horticulture, 32 (4): 221-236. DOI: 10.1080/01448765.2015.1133319
102	2016	Bhargava C, Deshmukh G, Sawarkar SD, Alawa SL, Ahirwar J (2016). The system of wheat intensification in comparison with convention method of wheat line sowing to increase wheat yield with low input cost. Plant Archives, 16 (2): 801-804.
103	2016	Bybee-Finley KA, Mirsky SB and Ryan MR (2016). Functional diversity in summer annual grass and legume intercrops in the northeastern United States. Crop Science, 56 (5): 2775-2790. DOI: 10.2135/cropsci2016.01.0046
104	2016	Gagné-Bourque F, Bertrand A, Claessens A, Aliferis KA and Jabaji S (2016). Alleviation of drought stress and metabolic changes in timothy (Phleum pratense L.) colonized with Bacillus subtilis B26. Frontiers in Plant Science, 7: 584. DOI: 10.3389/fpls.2016.00584
105	2016	Grabowski P and Haggblade S (2016). The Economics of Conservation Agriculture in Africa: Implications of Climate Change. In: Lal R et al (Eds.), Climate Change and Multi-Dimensional Sustainability in African Agriculture. Springer, Cham: 659-677. DOI: 10.1007/978-3-319-41238-2_34
106	2016	Hauggaard-Nielsen H, Lachouania P, Trydeman Knudsen M, Ambus P, Boelt B and Gislum R (2016). Productivity and carbon footprint of perennial grass–forage legume intercropping strategies with high or low nitrogen fertilizer input. Science of The Total Environment, 541: 1339-1347. DOI: 10.1016/j.scitotenv.2015.10.013
107	2016	Hamilton CE, Bever JD, Labbé J, Yang X and Yin H (2016). Mitigating climate change through managing constructed-microbial communities in agriculture. Agriculture, Ecosystems & Environment, 216: 304-308. DOI: 10.1016/j.agee.2015.10.006
108	2016	Isaacs KB, Snapp SS, Chung K and Waldman KB (2016). Assessing the value of diverse cropping systems under a new agricultural policy environment in Rwanda. Food Security, 8 (3): 491-506. DOI: 10.1007/s12571-016-0582-x
109	2016	Jabran K, Hussain M, Fahad S, Farooq M, Bajwa AA, Alharrby H and Nasim W (2016). Economic assessment of different mulches in conventional and water-saving rice production systems. Environmental Science and Pollution Research, 23 (9): 9156-9163. DOI: 10.1007/s11356-016-6162-y
110	2016	Kabir MJ, Cramb R, Alauddin M and Roth C (2016). Farming adaptation to environmental change in coastal Bangladesh: shrimp culture versus crop diversification. Environment, Development and Sustainability, 18 (4): 1195-1216. DOI: 10.1007/s10668-015-9697-z
111	2016	Karuma AN, Gachene CKK, Gicheru PT, Mtakwa PW, Amuri N (2016). Effects of tillage and cropping systems on maize and beans yield and selected yield components in a semi-arid area of Kenya. Tropical and Subtropical Agroecosystems, 19 (2): 167-179.
112	2016	Krishna Bahadur KB, Pant LP, Fraser EDG, Shrestha PK, Shrestha D and Lama A (2016). Assessing links between crop diversity and food self-sufficiency in three agroecological regions of Nepal. Regional Environmental Change, 16 (5): 1239-1251. DOI: 10.1007/s10113-015-0851-9
113	2016	Kuhn NJ, Hu Y, Bloemertz L, He J, Li H and Greenwood P (2016). Conservation tillage and sustainable intensification of agriculture: regional vs. global benefit analysis. Agriculture, Ecosystems & Environment, 216: 155-165. DOI: 10.1016/j.agee.2015.10.001
114	2016	Ločmele I, Legzdina L, Gaile Z and Kronberga A (2016). Cereal variety mixtures and populations for sustainable agriculture: A review. In: Research for Rural Development, 1, 22nd Annual International Scientific Conference Research for Rural Development: 7-14.
115	2016	Maharjan GR, Ruidisch M, Shope CL, Choi K, Huwe B, Kim SJ, Tenhunen J and Arnhold S (2016). Assessing the effectiveness of split fertilization and cover crop cultivation in order to conserve soil and water resources and improve crop productivity. Agricultural Water Management, 163: 305-318. DOI: 10.1016/j.agwat.2015.10.005
116	2016	Martin G, Moraine M, Ryschawy J, Magne M-A, Asai M, Sarthou J-P, Duru M and Therond O (2016). Crop–livestock integration beyond the farm level: a review. Agronomy for Sustainable Development, 36 (3): 53. DOI: 10.1007/s13593-016-0390-x
117	2016	Masilionytė L and Maikštėnienė S (2016). The effect of alternative cropping systems on the changes of the main nutritional elements in the soil. Zemdirbyste-Agriculture, 103 (1): 3-10. DOI: 10.13080/z-a.2016.103.001
118	2016	Matsushita K, Yamane F and Asano K (2016). Linkage between crop diversity and agro-ecosystem resilience: Nonmonotonic agricultural response under alternate regimes. Ecological Economics, 126: 23-31. DOI: 10.1016/j.ecolecon.2016.03.006
119	2016	Mupangwa W, Walker S, Masvaya E, Magombeyi M and Munguambe P (2016). Rainfall risk and the potential of reduced tillage systems to conserve soil water in semi-arid cropping systems of southern Africa. AIMS Agriculture and Food, 1 (1): 85-101. DOI: 10.3934/agrfood.2016.1.85.
120	2016	Murungweni C, Van Wijk MT, Smaling EMA and Giller KE (2016). Climate-smart crop production in semi-arid areas through increased knowledge of varieties, environment and management factors. Nutrient Cycling in Agroecosystems, 105 (3): 183-197. DOI: 10.1007/s10705-015-9695-4
121	2016	Norgrove L and Beck J (2016). Biodiversity Function and Resilience in Tropical Agroforestry Systems Including Shifting Cultivation. Current Forestry Reports, 2 (1): 62-80. DOI: 10.1007/s40725-016-0032-1
122	2016	Pignataro AG, Tachera SIL, Aguirre Rivera JR, Toral JN, González Espinosa and Rendón Carmona N (2016). Silvopastoral systems of the Chol Mayan ethnic group in southern Mexico: Strategies with a traditional basis. Journal of Environmental Management, 181: 363-373. DOI: 10.1016/j.jenvman.2016.06.036
123	2016	Ponisio LC and Ehrlich PR (2016). Diversification, yield and a new agricultural revolution: Problems and prospects. Sustainability-Basel, 8 (11): 1118. DOI: 10.3390/su8111118
124	2016	Ratnakumar P, Khan MIR, Minhas PS, Farooq MA, Sultana R, Per TS, Deokate PP, Khan NA, Singh Y, Rane J (2016). Can plant bio-regulators minimize crop productivity losses caused by drought, salinity and heat stress? An integrated review. Journal of Applied Botany and Food Quality, 89: 113-125. DOI: 10.5073/JABFQ.2016.089.014
125	2016	Saiz G, Wandera FM, Pelster DE, Ngetich W, Okalebo JR, Rufino MC and Butterbach-Bahla K (2016). Long-term assessment of soil and water conservation measures (Fanya-juu terraces) on soil organic matter in South Eastern Kenya. Geoderma, 274: 1-9. DOI: 10.1016/j.geoderma.2016.03.022
126	2016	Shifflett SD, Culbreth A, Hazel D, Daniels H, Nichols EG (2016). Coupling aquaculture with forest plantations for food, energy, and water resiliency. Science of the Total Environment, 571: 1262-1270. DOI: 10.1016/j.scitotenv.2016.07.161
127	2016	Sistla SA, Roddy AB, Williams NE, Kramer DB, Stevens K and Allison SD (2016). Agroforestry practices promote biodiversity and natural resource diversity in atlantic Nicaragua. PLoS ONE, 11 (9): e0162529. DOI: 10.1371/journal.pone.0162529
128	2016	Sithole NJ, Magwaza LS and Mafongoya PL (2016). Conservation agriculture and its impact on soil quality and maize yield: A South African perspective. Soil and Tillage Research, 162: 55-67. DOI: 10.1016/j.still.2016.04.014
129	2016	Teague WR, Apfelbaum S, Lal R, Kreuter UP, Rowntree J, Davies CA, Conser R, Rasmussen M, Hatfeld J, Wang T, Wang F and Byck P (2016). The role of ruminants in reducing agriculture's carbon footprint in North America. Journal of Soil and Water Conservation, 71 (2): 156-164. DOI: 10.2489/jswc.71.2.156
130	2016	Wani SA, Ali T, Sofi MN, Ramzan M and Hakeem KR (2016). An Appraisal of Conservation Tillage on the Soil Physical Properties. In: Hakeem et al (Eds.), Soil Science: Agricultural and Environmental Prospectives: 1-22. DOI: 10.1007/978-3-319-34451-5_1
131	2016	Wei W, Chen D, Wang L, Daryanto S, Chen L, Yu Y, Lu Y, Sun G and Feng T (2016). Global synthesis of the classifications, distributions, benefits and issues of terracing. Earth-Science Reviews, 159: 388-403. DOI: 10.1016/j.earscirev.2016.06.010
132	2016	Were K, Gelaw AM and Singh BR (2016). Smart strategies for enhanced agricultural resilience and food security under a changing climate in sub-saharan Africa. In: Lal R et al (Eds.), Climate Change and Multi-Dimensional Sustainability in African Agriculture: Climate Change and Sustainability in Agriculture: 431-453. DOI: 10.1007/978-3-319-41238-2_23
133	2017	Agegnehu G, Srivastava AK and Bird MI (2017). The role of biochar and biochar-compost in improving soil quality and crop performance: A review. Applied Soil Ecology, 119: 156-170. DOI: 10.1016/j.apsoil.2017.06.008
134	2017	Basche AD and Edelson OF (2017). Improving water resilience with more perennially based agriculture. Agroecology and Sustainable Food Systems, 41 (7): 799-824. DOI: 10.1080/21683565.2017.1330795
135	2017	Berg H, Ekman Söderholm A, Söderström A-S and Tam NT (2017). Recognizing wetland ecosystem services for sustainable rice farming in the Mekong Delta, Vietnam. Sustainability Science, 12 (1): 137-154. DOI: 10.1007/s11625-016-0409-x
136	2017	Bista P, Norton U, Ghimire R and Norton JB (2017). Effects of tillage system on greenhouse gas fluxes and soil mineral nitrogen in wheat (Triticum aestivum, L.)-fallow during drought. Journal of Arid Environments, 147: 103-113. DOI: 10.1016/j.jaridenv.2017.09.002
137	2017	Bunting SW, Kundu N and Ahmed N (2017). Evaluating the contribution of diversified shrimp-rice agroecosystems in Bangladesh and West Bengal, India to social-ecological resilience. Ocean & Coastal Management, 148: 63-74. DOI: 10.1016/j.ocecoaman.2017.07.010
138	2017	Ghimire R, Lamichhane S, Sharma Acharya B, Bista P and Man Sainjue U (2017). Tillage, crop residue, and nutrient management effects on soil organic carbon in rice-based cropping systems: A review. Journal of Integrative Agriculture, 16 (1): 1-15. DOI: 10.1016/S2095-3119(16)61337-0
139	2017	Gil JDB, Cohn AS, Duncan J, Newton P and Vermeulen S (2017). The resilience of integrated agricultural systems to climate change. Wiley Interdisciplinary Reviews: Climate Change, 8 (4): e461. DOI: 10.1002/wcc.461
140	2017	Gotor E, Bellon A, Polar V and Caracciolo F (2017). Assessing the Benefits of Andean Crop Diversity on Farmers' Livelihood: Insights from a Development Programme in Bolivia and Peru. Journal of International Development, 29 (7): 877-898. DOI: 10.1002/jid.3270
141	2017	Haddaway NR, Hedlund K, Jackson LE, Kätterer T, Lugato E, Thomsen IK, Jørgensen HB and Isberg P-E (2017). How does tillage intensity affect soil organic carbon? A systematic review. Environmental Evidence, 6 (1): 30. DOI: 10.1186/s13750-017-0108-9
142	2017	Hassen A, Talore DG, Tesfamariam EH, Friend MA and Mpanza TDE (2017). Potential use of forage-legume intercropping technologies to adapt to climate-change impacts on mixed crop-livestock systems in Africa: a review. Regional Environmental Change, 17 (6): 1713-1724. DOI: 10.1007/s10113-017-1131-7
143	2017	Kaye JP and Quemada M (2017). Using cover crops to mitigate and adapt to climate change. A review. Agronomy for Sustainable Development, 37 (1): 4. DOI: 10.1007/s13593-016-0410-x
144	2017	Khakbazan M, Larney FJ, Huang J, Mohr R, Pearson DC, Blackshaw RE (2017). Energy Use Efficiency of Conventional versus Conservation Management Practices for Irrigated Potato Production in Southern Alberta. American Journal of Potato Research, 94 (2): 105-119. DOI: 10.1007/s12230-016-9551-3
145	2017	Kovács‐Hostyánszki A, Espíndola A, VanbergenAJ, Settele J, Kremen C and Dicks LV (2017). Ecological intensification to mitigate impacts of conventional intensive land use on pollinators and pollination. Ecology Letters, 20 (5): 673-689. DOI: 10.1111/ele.12762
146	2017	Maaz TM, Schillinger WF, Machado S, Brooks E, Johnson-Maynard JL, Young LE, Young FL, Leslie I, Glover A, Madsen IJ, Esser A, Collins HP and Pan WL (2017). Impact of climate change adaptation strategies on winter wheat and cropping system performance across precipitation gradients in the Inland Pacific Northwest, USA. Frontiers in Environmental Science, 5: 23. DOI: 10.3389/fenvs.2017.00023
147	2017	Makate C, Makate M and Mango N (2017). Sustainable agriculture practices and livelihoods in pro-poor smallholder farming systems in southern Africa. African Journal of Science, Technology, Innovation and Development, 9 (3): 269-279. DOI: 10.1080/20421338.2017.1322350
148	2017	Masvaya EN, Nyamangara J Descheemaeker K and Giller KE (2017). Tillage, mulch and fertiliser impacts on soil nitrogen availability and maize production in semi-arid Zimbabwe. Soil and Tillage Research, 168: 125-132. DOI: 10.1016/j.still.2016.12.007
149	2017	Mupangwa W, Mutenje M, Thierfelder C and Nyagumbo I (2017). Are conservation agriculture (CA) systems productive and profitable options for smallholder farmers in different agro-ecoregions of Zimbabwe? Renewable Agriculture and Food Systems, 32 (1): 87-103. DOI: 10.1017/S1742170516000041
150	2017	Pandey R, Aretano R, Gupta AK, Meena D, Kumar B and Alatalo JM (2017). Agroecology as a Climate Change Adaptation Strategy for Smallholders of Tehri-Garhwal in the Indian Himalayan Region. Small-Scale Forestry, 16 (1): 53-63. DOI: 10.1007/s11842-016-9342-1
151	2017	Partey S, Zougmoré R, Ouédraogo M and Thevathasan N (2017). Why Promote Improved Fallows as a Climate-Smart Agroforestry Technology in Sub-Saharan Africa? Sustainability-Basel, 9 (11): 1887. DOI: 10.3390/su9111887
152	2017	Pooniya V, Choudhary AK and Swarnalakshmi K (2017). High-Value Crops’ Imbedded Intensive Cropping Systems for Enhanced Productivity, Resource-Use-Efficiency, Energetics and Soil-Health in Indo-Gangetic Plains. Proceedings of the National Academy of Sciences India Section B - Biological Sciences, 87 (4): 1073-1090. DOI: 10.1007/s40011-015-0679-6
153	2017	Raseduzzaman M and Jensen ES (2017). Does intercropping enhance yield stability in arable crop production? A meta-analysis. European Journal of Agronomy, 91: 25-33. DOI: 10.1016/j.eja.2017.09.009
154	2017	Reed J, van Vianen J, Foli S, Clendenning J, Yang K, MacDonald M, Petrokofsky G, Padoch C and Sunderland T (2017). Trees for life: The ecosystem service contribution of trees to food production and livelihoods in the tropics. Forest Policy and Economics, 84: 62-71. DOI: 10.1016/j.forpol.2017.01.012
155	2017	Reheul D, Cougnon M, Kayser M, Pannecoucque J, Swanckaert J, De Cauwer B, van den Pol‐van Dasselaar A and De Vliegher A (2017). Sustainable intensification in the production of grass and forage crops in the Low Countries of north-west Europe. Grass and Forage Science, 72 (3): 369-381. DOI: 10.1111/gfs.12285
156	2017	Richter BD, Brown JD, DiBenedetto R, Gorsky A, Keenan E, Madray C, Morris M, Rowell D and Ryu S (2017). Opportunities for saving and reallocating agricultural water to alleviate water scarcity. Water Policy, 19 (5): 886-907. DOI: 10.2166/wp.2017.143.
157	2017	Schneider M, Andres C, Trujillo G, Alcon F, Amurrio P, Perez E, Weibel F, Milz J (2017). Cocoa and total system yields of organic and conventional agroforestry vs. monoculture systems in a long-term field trial in Bolivia. Experimental Agriculture, 53 (3): 351-374. DOI: 10.1017/S0014479716000417
158	2017	Seufert V and Ramankutty N (2017). Many shades of gray—the context-dependent performance of organic agriculture. Science Advances, 3 (3): e1602638. DOI: 10.1126/sciadv.1602638
159	2017	Shahid M, Nayak AK, Puree C, Tripathi R, Lal B, Gautam P, Bhattacharyya P, Mohanty S, Kumar A, Panda BB, Kumar U and Shukla AK (2017). Carbon and nitrogen fractions and stocks under 41 years of chemical and organic fertilization in a sub-humid tropical rice soil. Soil and Tillage Research, 170: 136-146. DOI: 10.1016/j.still.2017.03.008
160	2017	Shennan C, Krupnik TJ, Baird G, Cohen H, Forbush K, Lovell RJ and Olimpi EM (2017). Organic and Conventional Agriculture: A Useful Framing? Annual Review of Environment and Resources, 42 (1): 317-346. DOI: 10.1146/annurev-environ-110615-085750
161	2017	Thakur AK and Uphoff NT (2017). How the System of Rice Intensification Can Contribute to Climate-Smart Agriculture. Agronomy Journal, 109 (4): 1163. DOI: 10.2134/agronj2016.03.0162
162	2017	Uphoff N (2017). SRI: An agroecological strategy to meet multiple objectives with reduced reliance on inputs. Agroecology and Sustainable Food Systems, 41 (7): 825-854. DOI: 10.1080/21683565.2017.1334738
163	2018	Acharya CL, Bandyopadhyay KK and Hati KM (2018). Mulches: Role in Climate Resilient Agriculture. Reference Module in Earth Systems and Environmental Sciences. DOI: 10.1016/b978-0-12-409548-9.11654-9
164	2018	Awad YM, Wang J, Igalavithana AD, Tsang DCW, Kim K-H, Lee SS and Ok YS (2018). Biochar Effects on Rice Paddy: Meta-analysis. Advances in Agronomy, 148: 1-32. DOI: 10.1016/bs.agron.2017.11.005
165	2018	Barbeau CD, Wilton MJ, Oelbermann M, Karagatzides JD and Tsuji LJS (2018). Local food production in a subarctic Indigenous community: the use of willow (Salix spp.) windbreaks to increase the yield of intercropped potatoes (Solanum tuberosum) and bush beans (Phaseolus vulgaris). International Journal of Agricultural Sustainability, 16 (1): 29-39. DOI: 10.1080/14735903.2017.1400713
166	2018	Bàrberi P (2018). Functional agrobiodiversity: approach, examples and applicability to banana cropping systems. Acta Horticulturae, 1196: 55-62. DOI: 10.17660/actahortic.2018.1196.6
167	2018	Calderón CI, Jerónimo C, Praun A, Reyna J, Santos Castillo ID, León R, Hogan R and Prado Córdova JP (2018). Agroecology-based farming provides grounds for more resilient livelihoods among smallholders in Western Guatemala. Agroecology and Sustainable Food Systems, 42 (10): 1128-1169. DOI: 10.1080/21683565.2018.1489933
168	2018	Chen Y, Camps-Arbestain M, Shen Q, Singh B and Cayuela ML (2018). The long-term role of organic amendments in building soil nutrient fertility: a meta-analysis and review. Nutrient Cycling in Agroecosystems, 111 (2-3): 103-125. DOI: 10.1007/s10705-017-9903-5
169	2018	D’Acunto L, Andrade JF, Poggio SL and Semmartin M (2018). Diversifying crop rotation increased metabolic soil diversity and activity of the microbial community. Agriculture, Ecosystems & Environment, 257: 159-164. DOI: 10.1016/j.agee.2018.02.011
170	2018	Das A, Layek J, Ramkrushna GI, Patel DP, Choudhury BU, Krishnappa R, Buragohain J and Yadav GS (2017). Modified system of rice intensification for higher crop and water productivity in Meghalaya, India: opportunities for improving livelihoods for resource-poor farmers. Paddy and Water Environment, 16 (1): 23-34. DOI: 10.1007/s10333-017-0609-8
171	2018	Delaquis E, de Haan S and Wyckhuys KAG (2018). On-farm diversity offsets environmental pressures in tropical agro-ecosystems: A synthetic review for cassava-based systems. Agriculture, Ecosystems & Environment, 251: 226-235. DOI: 10.1016/j.agee.2017.09.037
172	2018	Dubs F, Vergnes A, Mirlicourtois E, Le Viol I, Kerbiriou C, Goulnik J, Belghali S, Bentze L, Barot S and Porcher E (2018). Positive effects of wheat variety mixtures on aboveground arthropods are weak and variable. Basic and Applied Ecology, 33: 66-78. DOI: 10.1016/j.baae.2018.07.008
173	2018	Duriaux Chavarría J-Y, Baudron F and Sunderland T (2018). Retaining forests within agricultural landscapes as a pathway to sustainable intensification: Evidence from Southern Ethiopia. Agriculture, Ecosystems & Environment, 263: 41-52. DOI: 10.1016/j.agee.2018.04.020
174	2018	El-Naggar A, Awad YM, Tang X-Y, Liu C, Niazi NK, Jien S-H, Tsand DCW, Song H, Ok YS and Lee SS (2018). Biochar influences soil carbon pools and facilitates interactions with soil: A field investigation. Land Degradation & Development, 29 (7): 2162-2171. DOI: 10.1002/ldr.2896
175	2018	Félix GF, Diedhiou I, Le Garff M, Timmermann C, Clermont-Dauphin C, Cournac L, Groot CJC and Tittonell P (2018). Use and management of biodiversity by smallholder farmers in semi-arid West Africa. Global Food Security, 18: 76-85. DOI: 10.1016/j.gfs.2018.08.005
176	2018	Gouda S, Nayak S, Bishwakarma S, Kerry RG, Das G and Patra JK (2018). Role of Microbial Technology in Agricultural Sustainability. Microbial Biotechnology, 1: 181-202. DOI: 10.1007/978-981-10-6847-8_8
177	2018	Heckelman A, Smukler S and Wittman H (2018). Cultivating climate resilience: a participatory assessment of organic and conventional rice systems in the Philippines. Renewable Agriculture and Food Systems, 33 (3): 225-237. DOI: 10.1017/s1742170517000709
178	2018	Imran M, Ali A, Ashfaq M, Hassan S, Culas R and Ma C (2018). Impact of Climate Smart Agriculture (CSA) Practices on Cotton Production and Livelihood of Farmers in Punjab, Pakistan. Sustainability-Basel, 10 (6): 2101. DOI: 10.3390/su10062101
179	2018	Izydorczyk K, Michalska-Hejduk D, Jarosiewicz P, Bydałek F and Frątczak W (2018). Extensive grasslands as an effective measure for nitrate and phosphate reduction from highly polluted subsurface flow – Case studies from Central Poland. Agricultural Water Management, 203: 240-250. DOI: 10.1016/j.agwat.2018.03.021
180	2018	Jiang H, Han X, Zou W, Hao X and Zhang B (2018). Seasonal and long-term changes in soil physical properties and organic carbon fractions as affected by manure application rates in the Mollisol region of Northeast China. Agriculture, Ecosystems & Environment, 268: 133-143. DOI: 10.1016/j.agee.2018.09.007
181	2018	Kamran MA, Jiang J, Li J, Shi R, Mehmood K, Baquy MA-A and Xu R (2018). Amelioration of soil acidity, Olsen-P, and phosphatase activity by manure- and peat-derived biochars in different acidic soils. Arabian Journal of Geosciences, 11 (11). DOI: 10.1007/s12517-018-3616-1
182	2018	Khan N, Bano A, Shahid MA, Nasim W and Ali Babar M (2018). Interaction between PGPR and PGR for water conservation and plant growth attributes under drought condition. Biologia, 73 (11): 1083-1098. DOI: 10.2478/s11756-018-0127-1
183	2018	Komarek AM (2018). Conservation agriculture in western China increases productivity and profits without decreasing resilience. Food Security, 10 (5): 1251-1277. DOI: 10.1007/s12571-018-0833-0
184	2018	Kosmowski F (2018). Soil water management practices (terraces) helped to mitigate the 2015 drought in Ethiopia. Agricultural Water Management, 204: 11-16. DOI: 10.1016/j.agwat.2018.02.025
185	2018	Lee C-H, Wang C-C, Lin H-H, Lee SS, Tsang DCW, Jien S-H and Ok YS (2018). In-situ biochar application conserves nutrients while simultaneously mitigating runoff and erosion of an Fe-oxide-enriched tropical soil. Science of The Total Environment, 619-620: 665-671. DOI: 10.1016/j.scitotenv.2017.11.023
186	2018	Luo G, Li L, Friman V-P, Guo J, Guo S, Shen Q and Ling N (2018). Organic amendments increase crop yields by improving microbe-mediated soil functioning of agroecosystems: A meta-analysis. Soil Biology and Biochemistry, 124: 105-115. DOI: 10.1016/j.soilbio.2018.06.002
187	2018	Malobane ME, Nciizah AD, Wakindiki IIC and Mudau FN (2018). Sustainable production of sweet sorghum for biofuel production through conservation agriculture in South Africa. Food and Energy Security, 7 (3): e00129. DOI: 10.1002/fes3.129
188	2018	Martin A, Coolsaet B, Corbera E, Dawson N, Fisher J, Franks P, Mertz O, Pascual U, Rasmussen LV, Ryan C (2018). Land use intensification: The promise of sustainability and the reality of trade-offs. In: Schreckenberg K et al (Eds.), Ecosystem Services and Poverty Alleviation - Trade-offs and Governance. DOI: 10.4324/9780429507090
189	2018	Martinez-Mate MA, Martin-Gorriz B, Martínez-Alvarez V, Soto-García M and Maestre-Valero JF (2018). Hydroponic system and desalinated seawater as an alternative farm-productive proposal in water scarcity areas: Energy and greenhouse gas emissions analysis of lettuce production in southeast Spain. Journal of Cleaner Production, 172: 1298-1310. DOI: 10.1016/j.jclepro.2017.10.275
190	2018	Meemken E-M and Qaim M (2018). Organic Agriculture, Food Security, and the Environment. Annual Review of Resource Economics, 10 (1): 39-63. DOI: 10.1146/annurev-resource-100517-023252
191	2018	Meng Q, Cui Z, Yang H, Zhang F and Chen X (2018). Establishing High-Yielding Maize System for Sustainable Intensification in China. Advances in Agronomy, 148: 85-109. DOI: 10.1016/bs.agron.2017.11.004
192	2018	Mortimer R, Saj S and David C (2018). Supporting and regulating ecosystem services in cacao agroforestry systems. Agroforestry Systems, 92: 1639-1657. DOI: 10.1007/s10457-017-0113-6
193	2018	Nhamo N and Lungu ON (2018). Opportunities for Smallholder Farmers to Benefit From Conservation Agricultural Practices. In: Nhamo el al (Eds.), Smart Technologies for Sustainable Smallholder Agriculture: 145-163. DOI: 10.1016/b978-0-12-810521-4.00007-4
194	2018	Norris CE and Congreves KA (2018). Alternative Management Practices Improve Soil Health Indices in Intensive Vegetable Cropping Systems: A Review. Frontiers in Environmental Science, 6: 50. DOI: 10.3389/fenvs.2018.00050
195	2018	Pokharel P, Kwak J-H, Ok YS and Chang SX (2018). Pine sawdust biochar reduces GHG emission by decreasing microbial and enzyme activities in forest and grassland soils in a laboratory experiment. Science of The Total Environment, 625: 1247-1256. DOI: 10.1016/j.scitotenv.2017.12.343
196	2018	Pradhan A, Chan C, Roul PK, Halbrendt J and Sipes B (2018). Potential of conservation agriculture (CA) for climate change adaptation and food security under rainfed uplands of India: A transdisciplinary approach. Agricultural Systems, 163: 27-35. DOI: 10.1016/j.agsy.2017.01.002
197	2018	Roberts DP and Mattoo AK (2018). Sustainable agriculture—Enhancing environmental benefits, food nutritional quality and building crop resilience to abiotic and biotic stresses. Agriculture, 8 (1): 8. DOI: 10.3390/agriculture8010008
198	2018	Sauer CM, Mason NM, Maredia MK and Mofya-Mukuka R (2018). Does adopting legume-based cropping practices improve the food security of small-scale farm households? Panel survey evidence from Zambia. Food Security, 10 (6): 1463-1478. DOI: 10.1007/s12571-018-0859-3
199	2018	Sikka AK, Islam A and Rao KV (2018). Climate-Smart Land and Water Management for Sustainable Agriculture. Irrigation and Drainage, 67 (1): 72-81. DOI: 10.1002/ird.2162
200	2018	Sommer R, Paul BK, Mukalama J and Kihara J (2018). Reducing losses but failing to sequester carbon in soils – the case of Conservation Agriculture and Integrated Soil Fertility Management in the humid tropical agro-ecosystem of Western Kenya. Agriculture, Ecosystems & Environment, 254: 82-91. DOI: 10.1016/j.agee.2017.11.004
201	2018	Soriano MA and Herath S (2018). Quantifying the role of traditional rice terraces in regulating water resources: implications for management and conservation efforts. Agroecology and Sustainable Food Systems, 42 (8): 885-910. DOI: 10.1080/21683565.2018.1437497
202	2018	Steward PR, Dougill AJ, Thierfelder C, Pittelkow CM, Stringer LC, Kudzala M and Shackelford GE (2018). The adaptive capacity of maize-based conservation agriculture systems to climate stress in tropical and subtropical environments: A meta-regression of yields. Agriculture, Ecosystems & Environment, 251: 194-202. DOI: 10.1016/j.agee.2017.09.019
203	2018	Sun F, Pan K, Li Z, Wang S, Tariq A, Olatunji OA, Sun X, Zhang L, Shi W and Wu X (2018). Soybean supplementation increases the resilience of microbial and nematode communities in soil to extreme rainfall in an agroforestry system. Science of The Total Environment, 626: 776-784. DOI: 10.1016/j.scitotenv.2018.01.063
204	2018	Tabacco E, Comino L and Borreani G (2018). Production efficiency, costs and environmental impacts of conventional and dynamic forage systems for dairy farms in Italy. European Journal of Agronomy, 99: 1-12. DOI: 10.1016/j.eja.2018.06.004
205	2018	Villagra-Mendoza K and Horn R (2018). Effect of biochar addition on hydraulic functions of two textural soils. Geoderma, 326: 88-95. DOI: 10.1016/j.geoderma.2018.03.021
206	2018	Wang L, Li L, Cheng K, Ji C, Yue Q, Bian R and Pan G (2018). An assessment of emergy, energy, and cost-benefits of grain production over 6 years following a biochar amendment in a rice paddy from China. Environmental Science and Pollution Research, 25 (10): 9683-9696. DOI: 10.1007/s11356-018-1245-6
207	2018	Waha K, van Wijk MT, Fritz S, See L, Thornton PK, Wichern J and Herrero M (2018). Agricultural diversification as an important strategy for achieving food security in Africa. Global Change Biology, 24 (8): 3390-3400. DOI: 10.1111/gcb.14158
208	2018	Yu J, Deem LM, Crow SE, Deenik JL and Penton CR (2018). Biochar application influences microbial assemblage complexity and composition due to soil and bioenergy crop type interactions. Soil Biology and Biochemistry, 117: 97-107. DOI: 10.1016/j.soilbio.2017.11.017
209	2018	Zougmoré R (2018). Promoting Climate-Smart Agriculture Through Water and Nutrient Interactions Options in Semi-arid West Africa: A Review of Evidence and Empirical Analysis. Bationo A et al (Eds.), Improving the Profitability, Sustainability and Efficiency of Nutrients Through Site Specific Fertilizer Recommendations in West Africa Agro-Ecosystems: 249-263. DOI: 10.1007/978-3-319-58792-9_15
